# Supplementary material for: Long-read sequencing for fast and robust identification of correct genome-edited alleles: PCR-based and Cas9 capture methods
Source: PubMed Central journal article supplement (PMC10954187; doi:10.1371/journal.pgen.1011187), 2024-03-08
Supplement: pgen.1011187.s003.pdf [file pgen.1011187.s003.pdf]

S3 Table. Percentage of WT sequence recall with Fast basecalled data across a range of Filtong thresholds.

| Target      | Filtong threshold | Whole interval |       |       |       |       | Interval filtered for 5+ base homopolymers |        |       |       |       | Interval filtered for 4+ base homopolymers |      |        |        |       |       |       |      |
|-------------|-------------------|----------------|-------|-------|-------|-------|--------------------------------------------|--------|-------|-------|-------|--------------------------------------------|------|--------|--------|-------|-------|-------|------|
|             |                   | 50%            | 60%   | 70%   | 80%   | 90%   | 100%                                       | 50%    | 60%   | 70%   | 80%   | 90%                                        | 100% | 50%    | 60%    | 70%   | 80%   | 90%   | 100% |
| 64305ZF11Rk | 84                | 99.71          | 99.48 | 99.19 | 97.27 | 89.50 | 0.35                                       | 100.00 | 99.82 | 99.70 | 98.19 | 90.49                                      | 0.36 | 100.00 | 99.94  | 99.81 | 98.55 | 91.38 | 0.38 |
| Acvz2b      | 84                | 99.62          | 99.20 | 98.03 | 95.68 | 83.65 | 0.28                                       | 99.95  | 99.71 | 98.64 | 96.46 | 84.47                                      | 0.29 | 100.00 | 99.95  | 99.33 | 97.58 | 85.85 | 0.31 |
| Clm2        | 84                | 99.72          | 99.44 | 99.01 | 96.69 | 88.45 | 0.42                                       | 100.00 | 99.85 | 99.49 | 97.24 | 88.98                                      | 0.44 | 100.00 | 100.00 | 99.85 | 97.94 | 89.63 | 0.46 |
| Cx3d1       | 84                | 99.60          | 99.26 | 98.86 | 97.38 | 89.25 | 0.40                                       | 99.93  | 99.72 | 99.38 | 98.20 | 90.22                                      | 0.42 | 100.00 | 99.93  | 99.64 | 98.62 | 91.07 | 0.44 |
| Ipp5k       | 84                | 99.90          | 99.53 | 99.00 | 97.35 | 88.24 | 0.35                                       | 100.00 | 99.64 | 99.17 | 97.51 | 88.43                                      | 0.36 | 100.00 | 99.88  | 99.57 | 98.15 | 89.43 | 0.37 |
| Mpeg1       | 84                | 99.74          | 99.36 | 98.60 | 97.70 | 86.97 | 0.77                                       | 100.00 | 99.61 | 98.96 | 98.05 | 87.63                                      | 0.78 | 100.00 | 99.86  | 99.72 | 99.03 | 88.67 | 0.83 |
| 64305ZF11Rk | 85                | 99.71          | 99.48 | 99.19 | 97.33 | 89.56 | 0.35                                       | 100.00 | 99.82 | 99.70 | 98.19 | 90.55                                      | 0.36 | 100.00 | 99.94  | 99.81 | 98.55 | 91.45 | 0.38 |
| Acvz2b      | 85                | 99.62          | 99.15 | 98.07 | 95.68 | 83.84 | 0.28                                       | 99.95  | 99.66 | 98.69 | 96.46 | 84.66                                      | 0.29 | 100.00 | 99.95  | 99.33 | 97.58 | 86.06 | 0.31 |
| Clm2        | 85                | 99.72          | 99.44 | 99.01 | 96.69 | 88.59 | 0.42                                       | 100.00 | 99.85 | 99.49 | 97.24 | 89.12                                      | 0.44 | 100.00 | 100.00 | 99.85 | 97.94 | 89.78 | 0.46 |
| Cx3d1       | 85                | 99.60          | 99.33 | 98.86 | 97.38 | 89.31 | 0.40                                       | 99.93  | 99.72 | 99.38 | 98.20 | 90.28                                      | 0.42 | 100.00 | 99.93  | 99.64 | 98.62 | 91.14 | 0.44 |
| Ipp5k       | 85                | 99.94          | 99.53 | 99.00 | 97.35 | 88.24 | 0.35                                       | 100.00 | 99.64 | 99.17 | 97.51 | 88.43                                      | 0.36 | 100.00 | 99.88  | 99.57 | 98.15 | 89.43 | 0.37 |
| Mpeg1       | 85                | 99.74          | 99.36 | 98.60 | 97.70 | 86.97 | 0.77                                       | 100.00 | 99.61 | 98.96 | 98.05 | 87.63                                      | 0.78 | 100.00 | 99.86  | 99.72 | 99.03 | 88.67 | 0.83 |
| 64305ZF11Rk | 86                | 99.71          | 99.48 | 99.19 | 97.33 | 89.62 | 0.35                                       | 100.00 | 99.82 | 99.70 | 98.19 | 90.61                                      | 0.36 | 100.00 | 99.94  | 99.81 | 98.55 | 91.51 | 0.38 |
| Acvz2b      | 86                | 99.62          | 99.20 | 98.07 | 95.68 | 83.94 | 0.28                                       | 99.95  | 99.71 | 98.69 | 96.46 | 84.76                                      | 0.29 | 100.00 | 99.95  | 99.33 | 97.58 | 86.16 | 0.31 |
| Clm2        | 86                | 99.72          | 99.44 | 99.01 | 96.76 | 88.87 | 0.42                                       | 100.00 | 99.85 | 99.49 | 97.32 | 89.34                                      | 0.44 | 100.00 | 100.00 | 99.85 | 98.02 | 90.01 | 0.46 |
| Cx3d1       | 86                | 99.60          | 99.33 | 98.86 | 97.38 | 89.45 | 0.40                                       | 99.93  | 99.72 | 99.38 | 98.20 | 90.42                                      | 0.42 | 100.00 | 99.93  | 99.64 | 98.62 | 91.29 | 0.44 |
| Ipp5k       | 86                | 99.94          | 99.53 | 99.00 | 97.35 | 88.42 | 0.35                                       | 100.00 | 99.64 | 99.17 | 97.51 | 88.61                                      | 0.36 | 100.00 | 99.88  | 99.57 | 98.15 | 89.56 | 0.37 |
| Mpeg1       | 86                | 99.74          | 99.36 | 98.60 | 97.70 | 87.10 | 0.77                                       | 100.00 | 99.61 | 98.96 | 98.05 | 87.76                                      | 0.78 | 100.00 | 99.86  | 99.72 | 99.03 | 88.81 | 0.83 |
| 64305ZF11Rk | 87                | 99.71          | 99.48 | 99.19 | 97.33 | 89.73 | 0.35                                       | 100.00 | 99.82 | 99.70 | 98.19 | 90.73                                      | 0.36 | 100.00 | 99.94  | 99.81 | 98.55 | 91.57 | 0.38 |
| Acvz2b      | 87                | 99.62          | 99.20 | 98.07 | 95.73 | 84.12 | 0.28                                       | 99.95  | 99.71 | 98.69 | 96.50 | 84.95                                      | 0.29 | 100.00 | 99.95  | 99.33 | 97.63 | 86.32 | 0.31 |
| Clm2        | 87                | 99.72          | 99.44 | 99.01 | 96.83 | 89.15 | 0.42                                       | 100.00 | 99.85 | 99.49 | 97.39 | 89.63                                      | 0.44 | 100.00 | 100.00 | 99.85 | 98.09 | 90.31 | 0.46 |
| Cx3d1       | 87                | 99.60          | 99.33 | 98.86 | 97.45 | 89.63 | 0.40                                       | 99.93  | 99.72 | 99.38 | 98.27 | 90.70                                      | 0.42 | 100.00 | 99.93  | 99.64 | 98.62 | 91.58 | 0.44 |
| Ipp5k       | 87                | 99.94          | 99.53 | 99.00 | 97.41 | 88.65 | 0.35                                       | 100.00 | 99.64 | 99.17 | 97.57 | 88.85                                      | 0.36 | 100.00 | 99.88  | 99.57 | 98.21 | 89.80 | 0.37 |
| Mpeg1       | 87                | 99.74          | 99.36 | 98.60 | 97.70 | 87.23 | 0.77                                       | 100.00 | 99.61 | 98.96 | 98.05 | 87.89                                      | 0.78 | 100.00 | 99.86  | 99.72 | 99.03 | 88.95 | 0.83 |
| 64305ZF11Rk | 88                | 99.71          | 99.48 | 99.19 | 97.33 | 89.85 | 0.35                                       | 100.00 | 99.82 | 99.70 | 98.19 | 90.85                                      | 0.36 | 100.00 | 99.94  | 99.81 | 98.55 | 91.70 | 0.38 |
| Acvz2b      | 88                | 99.62          | 99.20 | 98.07 | 95.73 | 84.50 | 0.28                                       | 99.95  | 99.71 | 98.69 | 96.50 | 85.34                                      | 0.29 | 100.00 | 99.95  | 99.33 | 97.63 | 86.73 | 0.31 |
| Clm2        | 88                | 99.72          | 99.44 | 99.01 | 96.83 | 89.30 | 0.42                                       | 100.00 | 99.85 | 99.49 | 97.39 | 89.63                                      | 0.44 | 100.00 | 100.00 | 99.85 | 98.09 | 90.31 | 0.46 |
| Cx3d1       | 88                | 99.60          | 99.33 | 98.86 | 97.45 | 90.12 | 0.40                                       | 99.93  | 99.72 | 99.38 | 98.27 | 91.12                                      | 0.42 | 100.00 | 99.93  | 99.64 | 98.62 | 92.01 | 0.44 |
| Ipp5k       | 88                | 99.94          | 99.53 | 99.00 | 97.47 | 89.24 | 0.35                                       | 100.00 | 99.64 | 99.17 | 97.63 | 89.44                                      | 0.36 | 100.00 | 99.88  | 99.57 | 98.27 | 90.30 | 0.37 |
| Mpeg1       | 88                | 99.74          | 99.36 | 98.60 | 97.70 | 87.36 | 0.77                                       | 100.00 | 99.61 | 98.96 | 98.05 | 88.02                                      | 0.78 | 100.00 | 99.86  | 99.72 | 99.03 | 89.09 | 0.83 |
| 64305ZF11Rk | 89                | 99.71          | 99.48 | 99.19 | 97.33 | 89.97 | 0.35                                       | 100.00 | 99.82 | 99.70 | 98.19 | 90.97                                      | 0.36 | 100.00 | 99.94  | 99.81 | 98.55 | 91.76 | 0.38 |
| Acvz2b      | 89                | 99.62          | 99.20 | 98.07 | 95.73 | 85.23 | 0.28                                       | 99.95  | 99.71 | 98.69 | 96.50 | 85.34                                      | 0.29 | 100.00 | 99.95  | 99.33 | 97.63 | 87.04 | 0.31 |
| Clm2        | 89                | 99.72          | 99.44 | 99.01 | 96.97 | 89.65 | 0.42                                       | 100.00 | 99.85 | 99.49 | 97.53 | 90.14                                      | 0.44 | 100.00 | 100.00 | 99.85 | 98.25 | 90.85 | 0.46 |
| Cx3d1       | 89                | 99.60          | 99.33 | 98.86 | 97.45 | 90.32 | 0.40                                       | 99.93  | 99.72 | 99.38 | 98.27 | 91.33                                      | 0.42 | 100.00 | 99.93  | 99.64 | 98.62 | 92.23 | 0.44 |
| Ipp5k       | 89                | 99.94          | 99.53 | 99.00 | 97.47 | 89.48 | 0.35                                       | 100.00 | 99.64 | 99.17 | 97.63 | 89.68                                      | 0.36 | 100.00 | 99.88  | 99.57 | 98.27 | 90.54 | 0.37 |
| Mpeg1       | 89                | 99.74          | 99.36 | 98.60 | 97.70 | 87.87 | 0.77                                       | 100.00 | 99.61 | 98.96 | 98.05 | 88.54                                      | 0.78 | 100.00 | 99.86  | 99.72 | 99.03 | 89.64 | 0.83 |
| 64305ZF11Rk | 90                | 99.71          | 99.48 | 99.19 | 97.33 | 89.97 | 0.35                                       | 100.00 | 99.82 | 99.70 | 98.19 | 90.97                                      | 0.36 | 100.00 | 99.94  | 99.81 | 98.55 | 91.76 | 0.38 |
| Acvz2b      | 90                | 99.62          | 99.20 | 98.07 | 95.73 | 85.16 | 0.28                                       | 99.95  | 99.76 | 98.79 | 96.55 | 85.97                                      | 0.29 | 100.00 | 99.95  | 99.38 | 97.69 | 87.35 | 0.31 |
| Clm2        | 90                | 99.72          | 99.44 | 99.01 | 97.11 | 89.93 | 0.42                                       | 100.00 | 99.85 | 99.49 | 97.68 | 90.43                                      | 0.44 | 100.00 | 100.00 | 99.85 | 98.40 | 91.15 | 0.46 |
| Cx3d1       | 90                | 99.60          | 99.33 | 98.86 | 97.45 | 90.39 | 0.40                                       | 99.93  | 99.72 | 99.38 | 98.27 | 91.39                                      | 0.42 | 100.00 | 99.93  | 99.64 | 98.62 | 92.30 | 0.44 |
| Ipp5k       | 90                | 99.94          | 99.53 | 99.06 | 97.53 | 89.59 | 0.35                                       | 100.00 | 99.64 | 99.23 | 97.69 | 89.80                                      | 0.36 | 100.00 | 99.88  | 99.57 | 98.33 | 90.67 | 0.37 |
| Mpeg1       | 90                | 99.74          | 99.36 | 98.60 | 97.70 | 88.51 | 0.77                                       | 100.00 | 99.61 | 98.96 | 98.05 | 89.06                                      | 0.78 | 100.00 | 99.86  | 99.72 | 99.03 | 90.19 | 0.83 |
| 64305ZF11Rk | 91                | 99.71          | 99.48 | 99.19 | 97.33 | 90.20 | 0.35                                       | 100.00 | 99.82 | 99.70 | 98.26 | 91.22                                      | 0.36 | 100.00 | 99.94  | 99.81 | 98.62 | 92.01 | 0.38 |
| Acvz2b      | 91                | 99.62          | 99.34 | 98.17 | 95.82 | 85.35 | 0.28                                       | 99.95  | 99.85 | 98.79 | 96.60 | 86.17                                      | 0.29 | 100.00 | 99.95  | 99.38 | 97.74 | 87.55 | 0.31 |
| Clm2        | 91                | 99.72          | 99.44 | 99.01 | 97.18 | 90.14 | 0.42                                       | 100.00 | 99.85 | 99.49 | 97.75 | 90.65                                      | 0.44 | 100.00 | 100.00 | 99.85 | 98.47 | 91.38 | 0.46 |
| Cx3d1       | 91                | 99.60          | 99.33 | 98.86 | 97.51 | 90.93 | 0.40                                       | 99.93  | 99.72 | 99.38 | 98.27 | 91.88                                      | 0.42 | 100.00 | 99.93  | 99.64 | 98.62 | 92.74 | 0.44 |
| Ipp5k       | 91                | 99.94          | 99.53 | 99.06 | 97.59 | 89.71 | 0.35                                       | 100.00 | 99.64 | 99.23 | 97.75 | 89.92                                      | 0.36 | 100.00 | 99.88  | 99.57 | 98.39 | 90.79 | 0.37 |
| Mpeg1       | 91                | 99.74          | 99.36 | 98.60 | 97.70 | 89.27 | 0.77                                       | 100.00 | 99.61 | 98.96 | 98.05 | 88.86                                      | 0.78 | 100.00 | 99.86  | 99.72 | 99.03 | 90.61 | 0.83 |
| 64305ZF11Rk | 92                | 99.71          | 99.48 | 99.19 | 97.45 | 90.78 | 0.35                                       | 100.00 | 99.82 | 99.70 | 98.32 | 91.82                                      | 0.36 | 100.00 | 99.94  | 99.81 | 98.62 | 92.58 | 0.38 |
| Acvz2b      | 92                | 99.62          | 99.34 | 98.12 | 95.77 | 86.24 | 0.28                                       | 99.95  | 99.85 | 98.74 | 96.55 | 87.09                                      | 0.29 | 100.00 | 99.95  | 99.33 | 97.69 | 88.48 | 0.31 |
| Clm2        | 92                | 99.72          | 99.44 | 99.08 | 97.25 | 90.70 | 0.42                                       | 100.00 | 99.85 | 99.56 | 97.82 | 91.23                                      | 0.44 | 100.00 | 100.00 | 99.85 | 98.55 | 91.91 | 0.46 |
| Cx3d1       | 92                | 99.60          | 99.40 | 98.86 | 97.72 | 91.13 | 0.40                                       | 99.93  | 99.79 | 99.38 | 98.40 | 92.02                                      | 0.42 | 100.00 | 100.00 | 99.64 | 98.77 | 92.88 | 0.44 |
| Ipp5k       | 92                | 99.94          | 99.59 | 99.12 | 97.65 | 90.30 | 0.35                                       | 100.00 | 99.70 | 99.29 | 97.81 | 90.51                                      | 0.36 | 100.00 | 99.88  | 99.57 | 98.39 | 91.41 | 0.37 |
| Mpeg1       | 92                | 99.74          | 99.36 | 98.72 | 97.70 | 89.53 | 0.77                                       | 100.00 | 99.61 | 99.09 | 98.05 | 90.10                                      | 0.78 | 100.00 | 99.86  | 99.72 | 99.03 | 90.88 | 0.83 |
| 64305ZF11Rk | 93                | 99.77          |       |       |       |       |                                            |        |       |       |       |                                            |      |        |        |       |       |       |      |
