# Supplementary material for: Long-read sequencing for fast and robust identification of correct genome-edited alleles: PCR-based and Cas9 capture methods
Source: PubMed Central journal article supplement (PMC10954187; doi:10.1371/journal.pgen.1011187), 2024-03-08
Supplement: pgen.1011187.s004.pdf [file pgen.1011187.s004.pdf]

S4 Table. Percentage of WT sequence recall with HAC basecalled data across a range of read depths.

| Target        | Depth | Whole interval |        |       |       |       | Interval filtered for 5+ base homopolymers |        |        |       |       | Interval filtered for 4+ base homopolymers |        |        |       |       |       |
|---------------|-------|----------------|--------|-------|-------|-------|--------------------------------------------|--------|--------|-------|-------|--------------------------------------------|--------|--------|-------|-------|-------|
|               |       | 50%            | 60%    | 70%   | 80%   | 90%   | 50%                                        | 60%    | 70%    | 80%   | 90%   | 50%                                        | 60%    | 70%    | 80%   | 90%   |       |
| Acrv2b        | 0     | 0.00           | 0.00   | 0.00  | 0.00  | 0.00  | 0.00                                       | 0.00   | 0.00   | 0.00  | 0.00  | 0.00                                       | 0.00   | 0.00   | 0.00  | 0.00  | 0.00  |
| Inpp5k        | 1     | 100.00         | 94.47  | 94.47 | 94.47 | 94.47 | 100.00                                     | 94.48  | 94.48  | 94.48 | 94.48 | 100.00                                     | 94.75  | 94.75  | 94.75 | 94.75 | 94.75 |
| Cln2          | 1     | 96.48          | 96.48  | 96.48 | 96.48 | 96.48 | 96.59                                      | 96.59  | 96.59  | 96.59 | 96.59 | 96.57                                      | 96.57  | 96.57  | 96.57 | 96.57 | 96.57 |
| Cx3c1         | 1     | 99.33          | 93.01  | 93.01 | 93.01 | 93.01 | 99.44                                      | 93.34  | 93.34  | 93.34 | 93.34 | 99.42                                      | 93.46  | 93.46  | 93.46 | 93.46 | 93.46 |
| 6430573F11Rik | 2     | 99.19          | 99.19  | 92.63 | 92.63 | 92.63 | 99.40                                      | 99.40  | 93.14  | 93.14 | 93.14 | 99.50                                      | 99.50  | 93.27  | 93.27 | 93.27 | 93.27 |
| Mpeg1         | 3     | 99.36          | 99.36  | 91.57 | 91.57 | 91.57 | 99.48                                      | 99.48  | 93.06  | 93.06 | 93.06 | 99.59                                      | 99.59  | 92.54  | 92.54 | 92.54 | 92.54 |
| Acrv2b        | 3     | 99.77          | 99.06  | 99.06 | 99.06 | 99.06 | 99.81                                      | 99.22  | 99.22  | 99.22 | 99.81 | 99.81                                      | 99.81  | 99.81  | 99.81 | 99.81 | 99.81 |
| Cx3c1         | 5     | 99.87          | 99.33  | 97.58 | 97.58 | 87.43 | 99.93                                      | 99.58  | 97.99  | 97.99 | 97.99 | 99.93                                      | 99.56  | 98.04  | 98.04 | 98.04 | 88.31 |
| 6430573F11Rik | 10    | 99.88          | 99.88  | 99.48 | 98.67 | 95.53 | 100.00                                     | 100.00 | 99.70  | 98.98 | 95.91 | 100.00                                     | 100.00 | 99.81  | 99.18 | 99.18 | 96.29 |
| Mpeg1         | 10    | 99.87          | 99.62  | 99.36 | 97.83 | 93.74 | 100.00                                     | 99.74  | 99.61  | 98.18 | 94.27 | 100.00                                     | 99.72  | 99.72  | 98.48 | 94.75 | 94.75 |
| Cln2          | 12    | 99.86          | 99.79  | 99.08 | 97.89 | 94.51 | 100.00                                     | 99.93  | 99.49  | 98.33 | 94.92 | 100.00                                     | 100.00 | 99.69  | 98.70 | 95.50 | 95.50 |
| Inpp5k        | 14    | 100.00         | 99.94  | 99.53 | 99.00 | 91.95 | 100.00                                     | 99.94  | 99.58  | 99.17 | 92.05 | 100.00                                     | 99.94  | 99.69  | 99.32 | 92.65 | 92.65 |
| Acrv2b        | 15    | 99.91          | 99.72  | 99.15 | 98.22 | 88.30 | 100.00                                     | 99.90  | 99.47  | 98.59 | 88.98 | 100.00                                     | 99.90  | 99.59  | 98.87 | 89.66 | 89.66 |
| Cx3c1         | 15    | 99.87          | 99.60  | 99.46 | 98.59 | 90.93 | 99.93                                      | 99.79  | 99.72  | 98.96 | 91.60 | 100.00                                     | 99.85  | 99.78  | 98.98 | 92.08 | 92.08 |
| 6430573F11Rik | 18    | 99.88          | 99.83  | 99.65 | 98.09 | 89.21 | 100.00                                     | 100.00 | 99.88  | 98.56 | 90.01 | 100.00                                     | 100.00 | 99.94  | 98.87 | 90.69 | 90.69 |
| Inpp5k        | 24    | 100.00         | 100.00 | 99.41 | 98.94 | 94.30 | 100.00                                     | 100.00 | 99.58  | 99.11 | 94.42 | 100.00                                     | 100.00 | 99.69  | 99.32 | 94.93 | 94.93 |
| Mpeg1         | 25    | 99.87          | 99.74  | 99.36 | 98.34 | 92.21 | 100.00                                     | 99.87  | 99.74  | 98.70 | 92.97 | 100.00                                     | 99.86  | 99.86  | 99.03 | 93.65 | 93.65 |
| Cx3c1         | 30    | 99.87          | 99.66  | 99.26 | 98.92 | 96.10 | 100.00                                     | 99.86  | 99.58  | 99.24 | 96.67 | 100.00                                     | 99.93  | 99.71  | 99.42 | 97.17 | 97.17 |
| Cln2          | 32    | 99.93          | 99.93  | 99.23 | 98.73 | 95.35 | 100.00                                     | 100.00 | 99.64  | 99.13 | 95.79 | 100.00                                     | 100.00 | 99.85  | 99.39 | 96.19 | 96.19 |
| Acrv2b        | 32    | 99.91          | 99.86  | 99.25 | 97.93 | 92.20 | 100.00                                     | 100.00 | 99.93  | 99.29 | 92.82 | 100.00                                     | 100.00 | 99.89  | 99.82 | 93.62 | 93.62 |
| 6430573F11Rik | 35    | 99.88          | 99.83  | 99.65 | 99.01 | 93.91 | 100.00                                     | 100.00 | 99.94  | 99.46 | 94.89 | 100.00                                     | 100.00 | 100.00 | 99.62 | 95.41 | 95.41 |
| Acrv2b        | 42    | 99.91          | 99.86  | 99.44 | 98.54 | 93.52 | 100.00                                     | 100.00 | 99.81  | 98.98 | 94.13 | 100.00                                     | 100.00 | 99.90  | 99.33 | 94.96 | 94.96 |
| 6430573F11Rik | 44    | 99.88          | 99.83  | 99.83 | 99.19 | 94.55 | 100.00                                     | 100.00 | 100.00 | 99.64 | 95.49 | 100.00                                     | 100.00 | 100.00 | 99.75 | 95.91 | 95.91 |
| Mpeg1         | 47    | 100.00         | 99.87  | 99.23 | 98.85 | 93.87 | 100.00                                     | 100.00 | 99.48  | 99.22 | 94.40 | 100.00                                     | 100.00 | 99.86  | 99.59 | 95.17 | 95.17 |
| Cx3c1         | 49    | 99.87          | 99.80  | 99.53 | 98.86 | 96.51 | 100.00                                     | 99.93  | 99.72  | 99.24 | 97.09 | 100.00                                     | 100.00 | 99.85  | 99.49 | 97.75 | 97.75 |
| Acrv2b        | 51    | 99.91          | 99.86  | 99.53 | 98.59 | 94.27 | 100.00                                     | 100.00 | 99.81  | 98.98 | 94.95 | 100.00                                     | 100.00 | 99.90  | 99.43 | 95.83 | 95.83 |
| 6430573F11Rik | 60    | 99.83          | 99.83  | 99.71 | 98.90 | 95.77 | 100.00                                     | 100.00 | 100.00 | 99.46 | 96.69 | 100.00                                     | 100.00 | 100.00 | 99.62 | 97.23 | 97.23 |
| Acrv2b        | 60    | 99.91          | 99.91  | 99.58 | 98.68 | 94.55 | 100.00                                     | 100.00 | 99.81  | 99.13 | 95.24 | 100.00                                     | 100.00 | 99.90  | 99.49 | 96.19 | 96.19 |
| Inpp5k        | 62    | 100.00         | 99.94  | 99.71 | 98.88 | 97.18 | 100.00                                     | 100.00 | 99.82  | 99.05 | 97.33 | 100.00                                     | 100.00 | 99.88  | 99.32 | 97.78 | 97.78 |
| Cln2          | 68    | 99.93          | 99.93  | 99.37 | 98.66 | 94.51 | 100.00                                     | 100.00 | 99.64  | 99.06 | 95.07 | 100.00                                     | 100.00 | 99.77  | 99.39 | 95.58 | 95.58 |
| Mpeg1         | 69    | 100.00         | 99.87  | 99.62 | 98.98 | 95.91 | 100.00                                     | 100.00 | 99.87  | 99.35 | 96.48 | 100.00                                     | 100.00 | 100.00 | 99.72 | 97.38 | 97.38 |
| Cx3c1         | 71    | 99.93          | 99.80  | 99.46 | 98.79 | 96.84 | 100.00                                     | 99.93  | 99.65  | 99.31 | 97.43 | 100.00                                     | 100.00 | 99.85  | 99.64 | 97.97 | 97.97 |
| 6430573F11Rik | 84    | 99.83          | 99.83  | 99.71 | 99.19 | 95.48 | 100.00                                     | 100.00 | 100.00 | 99.64 | 96.33 | 100.00                                     | 100.00 | 100.00 | 99.81 | 96.79 | 96.79 |
| Cx3c1         | 86    | 99.93          | 99.87  | 99.53 | 98.99 | 96.71 | 100.00                                     | 100.00 | 99.72  | 99.44 | 97.36 | 100.00                                     | 100.00 | 99.85  | 99.78 | 97.89 | 97.89 |
| Inpp5k        | 99    | 100.00         | 99.94  | 99.71 | 99.06 | 97.12 | 100.00                                     | 100.00 | 99.82  | 99.23 | 97.27 | 100.00                                     | 100.00 | 99.88  | 99.51 | 97.84 | 97.84 |
| Mpeg1         | 103   | 100.00         | 99.87  | 99.62 | 98.98 | 96.04 | 100.00                                     | 100.00 | 99.74  | 99.35 | 96.61 | 100.00                                     | 100.00 | 100.00 | 99.72 | 97.65 | 97.65 |
| Cln2          | 116   | 99.93          | 99.86  | 99.65 | 98.80 | 96.20 | 100.00                                     | 100.00 | 99.85  | 99.20 | 96.74 | 100.00                                     | 100.00 | 99.92  | 99.47 | 97.25 | 97.25 |
| Acrv2b        | 119   | 99.91          | 99.91  | 99.67 | 98.87 | 94.83 | 100.00                                     | 100.00 | 99.90  | 99.32 | 95.49 | 100.00                                     | 100.00 | 100.00 | 99.59 | 96.45 | 96.45 |
| Inpp5k        | 129   | 100.00         | 100.00 | 99.71 | 98.94 | 97.24 | 100.00                                     | 100.00 | 99.82  | 99.11 | 97.39 | 100.00                                     | 100.00 | 99.88  | 99.38 | 97.96 | 97.96 |
| Mpeg1         | 133   | 100.00         | 100.00 | 99.49 | 98.98 | 95.91 | 100.00                                     | 100.00 | 99.74  | 99.35 | 96.48 | 100.00                                     | 100.00 | 100.00 | 99.72 | 97.38 | 97.38 |
| Cln2          | 152   | 99.93          | 99.86  | 99.72 | 98.87 | 95.85 | 100.00                                     | 100.00 | 99.93  | 99.27 | 96.37 | 100.00                                     | 100.00 | 99.92  | 99.54 | 96.95 | 96.95 |
| Inpp5k        | 155   | 100.00         | 100.00 | 99.71 | 99.00 | 96.41 | 100.00                                     | 100.00 | 99.82  | 99.17 | 96.56 | 100.00                                     | 100.00 | 99.88  | 99.51 | 97.10 | 97.10 |
| Cx3c1         | 169   | 100.00         | 99.80  | 99.60 | 99.13 | 97.18 | 100.00                                     | 99.93  | 99.86  | 99.51 | 97.85 | 100.00                                     | 100.00 | 100.00 | 99.78 | 98.33 | 98.33 |
| 6430573F11Rik | 180   | 99.88          | 99.83  | 99.71 | 99.25 | 96.93 | 100.00                                     | 100.00 | 100.00 | 99.70 | 97.77 | 100.00                                     | 100.00 | 100.00 | 99.87 | 98.18 | 98.18 |
| Cln2          | 193   | 99.93          | 99.86  | 99.79 | 98.87 | 96.27 | 100.00                                     | 100.00 | 100.00 | 99.27 | 96.81 | 100.00                                     | 100.00 | 100.00 | 99.47 | 97.48 | 97.48 |
| Acrv2b        | 252   | 99.91          | 99.91  | 99.81 | 98.78 | 94.46 | 100.00                                     | 100.00 | 99.95  | 99.32 | 95.10 | 100.00                                     | 100.00 | 100.00 | 99.64 | 96.19 | 96.19 |
| Mpeg1         | 295   | 100.00         | 100.00 | 99.49 | 98.85 | 96.42 | 100.00                                     | 100.00 | 99.74  | 99.22 | 97.01 | 100.00                                     | 100.00 | 100.00 | 99.72 | 97.79 | 97.79 |
| Inpp5k        | 333   | 100.00         | 100.00 | 99.71 | 99.06 | 96.71 | 100.00                                     | 100.00 | 99.76  | 99.23 | 96.92 | 100.00                                     | 100.00 | 99.88  | 99.57 | 97.47 | 97.47 |
| Cx3c1         | 366   | 100.00         | 99.87  | 99.60 | 99.19 | 96.91 | 100.00                                     | 99.93  | 99.86  | 99.58 | 97.57 | 100.00                                     | 100.00 | 100.00 | 99.78 | 98.04 | 98.04 |
| Cln2          | 382   | 99.93          | 99.86  | 99.72 | 98.94 | 96.83 | 100.00                                     | 100.00 | 99.93  | 99.35 | 97.39 | 100.00                                     | 100.00 | 100.00 | 99.62 | 97.94 | 97.94 |
| 6430573F11Rik | 384   | 99.88          | 99.83  | 99.71 | 99.19 | 96.87 | 100.00                                     | 100.00 | 100.00 | 99.70 | 97.71 | 100.00                                     | 100.00 | 100.00 | 99.87 | 98.05 | 98.05 |
| Acrv2b        | 539   | 99.91          | 99.91  | 99.77 | 98.87 | 94.32 | 100.00                                     | 100.00 | 99.95  | 99.37 | 95.00 | 100.00                                     | 100.00 | 100.00 | 99.69 | 96.09 | 96.09 |
| Mpeg1         | 579   | 100.00         | 100.00 | 99.74 | 98.85 | 96.55 | 100.00                                     | 100.00 | 99.87  | 99.22 | 97.01 | 100.00                                     | 100.00 | 100.00 | 99.72 | 97.93 | 97.93 |
| Inpp5k        | 646   | 100.00         | 100.00 | 99.65 | 98.88 | 96.65 | 100.00                                     | 100.00 | 99.76  | 99.05 | 96.86 | 100.00                                     | 100.00 | 99.88  | 99.38 | 97.47 | 97.47 |
| Cln2          | 777   | 99.93          | 99.86  | 99.72 | 98.94 | 96.41 | 100.00                                     | 100.00 | 100.00 | 99.35 | 96.95 | 100.00                                     | 100.00 | 100.00 | 99.69 | 97.56 | 97.56 |
| 6430573F11Rik | 797   | 99.88          | 99.83  | 99.71 | 99.30 | 96.81 | 100.00                                     | 100.00 | 100.00 | 99.76 | 97.59 | 100.00                                     | 100.00 | 100.00 | 99.94 | 98.11 | 98.11 |
| Cx3c1         | 811   | 100.00         | 99.80  | 99.60 | 99.19 | 97.18 | 100.00                                     | 99.93  | 99.86  | 99.58 | 97.85 | 100.00                                     | 100.00 | 100.00 | 99.85 | 98.26 | 98.26 |
| Mpeg1         | 1158  | 100.00         | 100.00 | 99.74 | 98.98 | 97.06 | 100.00                                     | 100.00 | 99.87  | 99.35 | 97.40 | 100.00                                     | 100.00 | 100.00 | 99.86 | 98.20 | 98.20 |
| Inpp5k        | 1223  | 100.00         | 100.00 | 99.65 | 99.00 | 96.94 | 100.00                                     | 100.00 | 99.76  | 99.17 | 97.15 | 100.00                                     | 100.00 | 99.88  | 99.51 | 97.78 | 97.78 |
| Acrv2b        | 1326  | 99.91          | 99.91  | 99.77 | 98.87 | 94.69 | 100.00                                     | 100.00 | 99.95  | 99.32 | 95.39 | 100.00                                     | 100.00 | 100.00 | 99.64 | 96.45 | 96.45 |
| Cln2          | 1560  | 99.93          | 99.86  | 99.72 | 98.98 | 96.76 | 100.00                                     | 100.00 | 100.00 | 99.39 | 97.73 | 100.00                                     | 100.00 | 100.00 | 99.69 | 97.86 | 97.86 |
| 6430573F11Rik | 1920  | 99.83          | 99.83  | 99.60 | 99.30 | 96.78 | 100.00                                     | 100.00 | 99.93  | 99.71 | 96.98 | 100.00                                     | 100.00 | 100.00 | 99.83 | 98.24 | 98.24 |
| Cx3c1         | 1998  | 100.00         | 99.87  | 99.60 | 99.13 | 97.11 | 100.00                                     | 99.93  | 99.86  | 99.51 | 97.85 | 100.00                                     | 100.00 | 100.00 | 99.78 | 98.26 | 98.26 |
| Acrv2b        | 2677  | 99.91          | 99.91  | 99.77 | 98.83 | 94.79 | 100.00                                     | 100.00 | 99.95  | 99.32 | 95.49 | 100.00                                     | 100.00 | 100.00 | 99.64 | 96.60 | 96.60 |
| Mpeg1         | 2808  | 100.00         | 100.00 | 99.74 | 98.98 | 96.81 | 100.00                                     | 100.00 | 99.87  | 99.35 | 97.14 | 100.00                                     | 100.00 | 100.00 | 99.86 | 97.93 |       |
