# Supplementary material for: Long-read sequencing for fast and robust identification of correct genome-edited alleles: PCR-based and Cas9 capture methods
Source: PubMed Central journal article supplement (PMC10954187; doi:10.1371/journal.pgen.1011187), 2024-03-08
Supplement: pgen.1011187.s005.pdf [file pgen.1011187.s005.pdf]

S5 Table. Percentage of WT sequence recall with Fast basecalled data across a range of read depths.

| Target        | Depth | Whole interval |       |       |       | Interval filtered for 5+ base homopolymers |        |        |       |       | Interval filtered for 4+ base homopolymers |        |        |        |       |       |
|---------------|-------|----------------|-------|-------|-------|--------------------------------------------|--------|--------|-------|-------|--------------------------------------------|--------|--------|--------|-------|-------|
|               |       | 50%            | 60%   | 70%   | 80%   | 90%                                        | 50%    | 60%    | 70%   | 80%   | 90%                                        | 50%    | 60%    | 70%    | 80%   | 90%   |
| Acvr2b        | 6     | 99.25          | 97.84 | 97.84 | 91.97 | 70.93                                      | 99.71  | 98.40  | 98.40 | 92.77 | 71.31                                      | 99.85  | 98.77  | 98.77  | 93.36 | 71.76 |
| 6430573F11Rik | 7     | 99.71          | 99.59 | 98.38 | 92.98 | 73.38                                      | 99.94  | 99.88  | 98.98 | 93.62 | 73.59                                      | 100.00 | 99.94  | 99.12  | 93.96 | 73.71 |
| Cx3c1         | 7     | 99.46          | 98.79 | 97.51 | 92.47 | 67.41                                      | 99.79  | 99.24  | 98.06 | 93.20 | 67.94                                      | 99.85  | 99.42  | 98.47  | 93.46 | 68.55 |
| 6430573F11Rik | 8     | 99.65          | 99.30 | 97.68 | 91.88 | 71.58                                      | 99.94  | 99.70  | 98.38 | 92.48 | 71.84                                      | 100.00 | 99.75  | 98.49  | 92.89 | 71.95 |
| Cx3c1         | 9     | 99.33          | 98.86 | 98.39 | 96.44 | 89.31                                      | 99.65  | 99.38  | 98.96 | 96.95 | 90.08                                      | 99.78  | 99.56  | 99.35  | 97.39 | 90.70 |
| Acvr2b        | 11    | 99.62          | 98.40 | 96.57 | 92.02 | 81.73                                      | 99.90  | 98.98  | 97.23 | 92.77 | 82.28                                      | 100.00 | 99.38  | 97.84  | 93.62 | 83.08 |
| Clrn2         | 11    | 99.72          | 99.15 | 98.24 | 95.14 | 85.70                                      | 99.93  | 99.42  | 98.69 | 95.58 | 86.00                                      | 100.00 | 99.62  | 98.86  | 95.88 | 86.27 |
| Inpp5k        | 12    | 99.47          | 99.18 | 97.77 | 94.42 | 84.30                                      | 99.53  | 99.29  | 97.92 | 94.60 | 84.46                                      | 99.69  | 99.63  | 98.27  | 95.12 | 85.11 |
| Mpeg1         | 13    | 99.36          | 99.11 | 97.45 | 92.46 | 77.52                                      | 99.61  | 99.35  | 97.79 | 92.84 | 77.73                                      | 100.00 | 99.86  | 98.48  | 93.65 | 78.45 |
| Acvr2b        | 18    | 99.48          | 98.83 | 97.46 | 92.63 | 70.93                                      | 99.76  | 99.37  | 98.16 | 93.35 | 71.55                                      | 99.85  | 99.69  | 98.61  | 94.29 | 72.48 |
| Clrn2         | 22    | 99.72          | 99.58 | 97.89 | 96.06 | 86.27                                      | 99.93  | 99.93  | 98.40 | 96.66 | 86.73                                      | 100.00 | 100.00 | 98.78  | 97.25 | 87.19 |
| Cx3c1         | 22    | 99.73          | 99.33 | 97.98 | 96.77 | 85.62                                      | 99.93  | 99.79  | 98.54 | 97.36 | 86.40                                      | 99.93  | 99.85  | 98.91  | 97.75 | 87.00 |
| Inpp5k        | 23    | 99.76          | 99.35 | 98.94 | 95.83 | 84.24                                      | 99.82  | 99.53  | 99.11 | 96.03 | 84.40                                      | 99.94  | 99.75  | 99.44  | 96.66 | 84.92 |
| Mpeg1         | 23    | 99.36          | 99.11 | 98.72 | 94.89 | 80.46                                      | 99.61  | 99.35  | 99.09 | 95.31 | 80.73                                      | 100.00 | 100.00 | 100.00 | 96.13 | 81.77 |
| 6430573F11Rik | 24    | 99.71          | 99.54 | 98.55 | 97.39 | 83.41                                      | 99.94  | 99.94  | 99.16 | 98.13 | 84.06                                      | 99.94  | 99.94  | 99.43  | 98.62 | 84.53 |
| Acvr2b        | 25    | 99.58          | 98.87 | 97.75 | 95.40 | 78.21                                      | 99.90  | 99.47  | 98.45 | 96.12 | 78.83                                      | 100.00 | 99.74  | 98.97  | 97.02 | 79.84 |
| Cx3c1         | 27    | 99.87          | 99.26 | 98.32 | 96.91 | 81.18                                      | 100.00 | 99.72  | 98.96 | 97.57 | 82.10                                      | 100.00 | 99.85  | 99.35  | 97.89 | 82.79 |
| Acvr2b        | 31    | 99.62          | 98.97 | 97.89 | 95.26 | 82.81                                      | 99.90  | 99.51  | 98.59 | 95.97 | 83.59                                      | 100.00 | 99.74  | 99.02  | 96.81 | 84.77 |
| 6430573F11Rik | 36    | 99.71          | 99.48 | 98.90 | 97.10 | 84.69                                      | 100.00 | 99.88  | 99.46 | 97.89 | 85.38                                      | 100.00 | 99.87  | 99.69  | 98.30 | 86.04 |
| Acvr2b        | 37    | 99.62          | 99.11 | 97.79 | 95.02 | 78.16                                      | 99.95  | 99.61  | 98.50 | 95.78 | 78.88                                      | 100.00 | 99.85  | 99.02  | 96.66 | 80.04 |
| Cx3c1         | 38    | 99.73          | 99.19 | 98.45 | 96.71 | 82.93                                      | 100.00 | 99.65  | 99.03 | 97.43 | 83.90                                      | 100.00 | 99.85  | 99.35  | 97.82 | 84.53 |
| Clrn2         | 39    | 99.79          | 99.65 | 98.73 | 96.83 | 88.45                                      | 99.93  | 99.93  | 99.20 | 97.46 | 89.05                                      | 100.00 | 100.00 | 99.47  | 97.86 | 89.78 |
| Mpeg1         | 43    | 99.74          | 99.36 | 98.47 | 95.91 | 84.29                                      | 99.87  | 99.61  | 98.83 | 96.22 | 84.64                                      | 100.00 | 99.86  | 99.59  | 97.24 | 85.50 |
| Inpp5k        | 55    | 99.94          | 99.65 | 98.88 | 97.35 | 86.24                                      | 100.00 | 99.76  | 99.05 | 97.51 | 86.42                                      | 100.00 | 99.94  | 99.38  | 98.21 | 87.14 |
| 6430573F11Rik | 56    | 99.77          | 99.54 | 98.84 | 97.39 | 86.37                                      | 100.00 | 99.88  | 99.46 | 98.19 | 87.48                                      | 100.00 | 99.94  | 99.69  | 98.49 | 88.24 |
| Cx3c1         | 58    | 99.66          | 99.33 | 98.72 | 97.18 | 85.35                                      | 100.00 | 99.72  | 99.24 | 97.92 | 86.40                                      | 100.00 | 99.85  | 99.56  | 98.33 | 87.07 |
| Mpeg1         | 69    | 100.00         | 99.49 | 98.60 | 96.68 | 86.85                                      | 100.00 | 99.74  | 98.96 | 97.01 | 87.24                                      | 100.00 | 100.00 | 99.72  | 98.07 | 87.98 |
| Inpp5k        | 70    | 99.88          | 99.65 | 99.06 | 97.59 | 88.42                                      | 100.00 | 99.76  | 99.23 | 97.75 | 88.61                                      | 100.00 | 99.88  | 99.51  | 98.39 | 89.31 |
| Clrn2         | 73    | 99.79          | 99.58 | 98.87 | 96.62 | 85.99                                      | 99.93  | 99.85  | 99.42 | 97.24 | 86.51                                      | 100.00 | 99.92  | 99.77  | 97.71 | 87.41 |
| 6430573F11Rik | 77    | 99.77          | 99.59 | 98.90 | 97.62 | 87.65                                      | 100.00 | 100.00 | 99.52 | 98.44 | 88.63                                      | 100.00 | 100.00 | 99.75  | 98.81 | 89.37 |
| Acvr2b        | 83    | 99.67          | 99.11 | 98.31 | 95.30 | 83.23                                      | 99.95  | 99.61  | 98.88 | 96.02 | 84.08                                      | 100.00 | 99.79  | 99.28  | 97.17 | 85.19 |
| Inpp5k        | 91    | 99.94          | 99.59 | 99.12 | 97.47 | 88.65                                      | 100.00 | 99.70  | 99.29 | 97.63 | 88.91                                      | 100.00 | 99.88  | 99.63  | 98.27 | 89.62 |
| Mpeg1         | 95    | 99.87          | 99.49 | 98.72 | 96.81 | 85.95                                      | 100.00 | 99.74  | 99.09 | 97.14 | 86.46                                      | 100.00 | 100.00 | 99.72  | 98.07 | 87.29 |
| Clrn2         | 104   | 99.79          | 99.37 | 98.87 | 96.76 | 87.18                                      | 99.93  | 99.71  | 99.35 | 97.32 | 87.74                                      | 100.00 | 99.92  | 99.69  | 97.79 | 88.41 |
| Inpp5k        | 113   | 99.94          | 99.71 | 99.18 | 97.35 | 87.77                                      | 100.00 | 99.82  | 99.35 | 97.51 | 88.02                                      | 100.00 | 99.88  | 99.69  | 98.15 | 88.75 |
| Mpeg1         | 114   | 99.87          | 99.36 | 98.85 | 97.06 | 87.23                                      | 100.00 | 99.61  | 99.22 | 97.40 | 87.76                                      | 100.00 | 99.86  | 99.86  | 98.34 | 88.67 |
| Cx3c1         | 131   | 99.66          | 99.33 | 98.86 | 97.18 | 88.84                                      | 99.93  | 99.72  | 99.38 | 98.06 | 89.94                                      | 100.00 | 99.93  | 99.64  | 98.40 | 90.92 |
| 6430573F11Rik | 135   | 99.77          | 99.48 | 99.07 | 97.33 | 88.92                                      | 100.00 | 99.88  | 99.70 | 98.19 | 89.83                                      | 100.00 | 99.94  | 99.81  | 98.49 | 90.69 |
| Clrn2         | 138   | 99.72          | 99.44 | 99.01 | 96.27 | 87.82                                      | 99.93  | 99.85  | 99.49 | 98.88 | 88.40                                      | 100.00 | 100.00 | 99.77  | 97.41 | 89.17 |
| Acvr2b        | 155   | 99.67          | 99.15 | 98.07 | 95.58 | 83.33                                      | 99.95  | 99.66  | 98.64 | 96.36 | 84.08                                      | 100.00 | 99.90  | 99.13  | 97.43 | 85.29 |
| Mpeg1         | 213   | 99.87          | 99.62 | 98.85 | 97.06 | 88.12                                      | 100.00 | 99.87  | 99.22 | 97.40 | 88.67                                      | 100.00 | 100.00 | 99.86  | 98.34 | 89.50 |
| Inpp5k        | 218   | 99.94          | 99.59 | 99.06 | 97.18 | 87.65                                      | 100.00 | 99.76  | 99.23 | 97.33 | 87.90                                      | 100.00 | 99.88  | 99.57  | 97.96 | 88.81 |
| Cx3c1         | 257   | 99.60          | 99.19 | 98.79 | 97.31 | 88.51                                      | 99.93  | 99.65  | 99.31 | 98.13 | 89.38                                      | 100.00 | 99.93  | 99.56  | 98.55 | 90.41 |
| 6430573F11Rik | 269   | 99.77          | 99.54 | 98.96 | 97.39 | 89.79                                      | 100.00 | 99.88  | 99.58 | 98.26 | 90.79                                      | 100.00 | 99.94  | 99.69  | 98.62 | 91.64 |
| Clrn2         | 289   | 99.72          | 99.44 | 99.08 | 96.97 | 89.23                                      | 99.93  | 99.85  | 99.56 | 97.61 | 89.78                                      | 100.00 | 99.92  | 99.85  | 98.17 | 90.47 |
| Acvr2b        | 343   | 99.62          | 99.25 | 98.12 | 95.77 | 84.50                                      | 99.95  | 99.76  | 98.74 | 96.50 | 85.39                                      | 100.00 | 99.95  | 99.43  | 97.53 | 86.73 |
| Mpeg1         | 412   | 99.87          | 99.36 | 98.85 | 97.19 | 87.61                                      | 100.00 | 99.61  | 99.22 | 97.53 | 88.15                                      | 100.00 | 100.00 | 99.86  | 98.48 | 89.23 |
| Inpp5k        | 446   | 99.94          | 99.59 | 99.06 | 97.41 | 89.01                                      | 100.00 | 99.76  | 99.23 | 97.57 | 89.21                                      | 100.00 | 99.88  | 99.51  | 98.27 | 90.11 |
| Cx3c1         | 539   | 99.60          | 99.26 | 98.79 | 97.65 | 89.92                                      | 99.93  | 99.72  | 99.31 | 98.33 | 90.91                                      | 100.00 | 99.93  | 99.56  | 98.77 | 91.79 |
| 6430573F11Rik | 555   | 99.71          | 99.48 | 99.13 | 97.56 | 89.68                                      | 100.00 | 99.82  | 99.64 | 98.50 | 90.61                                      | 100.00 | 99.94  | 99.75  | 98.81 | 91.51 |
| Clrn2         | 587   | 99.72          | 99.37 | 99.08 | 96.83 | 89.01                                      | 99.93  | 99.78  | 99.56 | 97.46 | 89.56                                      | 100.00 | 99.92  | 99.77  | 98.02 | 90.31 |
| Mpeg1         | 845   | 99.74          | 99.49 | 98.72 | 97.19 | 87.48                                      | 100.00 | 99.74  | 99.09 | 97.53 | 88.02                                      | 100.00 | 99.86  | 99.72  | 98.48 | 88.95 |
| Acvr2b        | 874   | 99.62          | 99.15 | 97.98 | 95.63 | 84.92                                      | 99.95  | 99.66  | 98.64 | 96.41 | 85.68                                      | 100.00 | 99.95  | 99.33  | 97.53 | 87.14 |
| Inpp5k        | 916   | 99.94          | 99.53 | 99.00 | 97.53 | 88.54                                      | 100.00 | 99.64  | 99.17 | 97.69 | 88.73                                      | 100.00 | 99.88  | 99.51  | 98.33 | 89.74 |
| Clrn2         | 1166  | 99.65          | 99.44 | 99.08 | 97.11 | 89.51                                      | 99.93  | 99.85  | 99.56 | 97.68 | 89.99                                      | 100.00 | 100.00 | 99.77  | 98.40 | 90.69 |
| 6430573F11Rik | 1393  | 99.71          | 99.48 | 99.07 | 97.39 | 90.14                                      | 100.00 | 99.82  | 99.64 | 98.32 | 91.16                                      | 100.00 | 99.94  | 99.75  | 98.62 | 91.95 |
| Cx3c1         | 1406  | 99.60          | 99.26 | 98.92 | 97.72 | 90.12                                      | 99.93  | 99.72  | 99.44 | 98.40 | 91.12                                      | 100.00 | 99.93  | 99.71  | 98.77 | 92.01 |
| Acvr2b        | 1779  | 99.67          | 99.30 | 98.12 | 95.77 | 84.88                                      | 99.95  | 99.81  | 98.74 | 96.55 | 85.68                                      | 100.00 | 99.95  | 99.33  | 97.69 | 87.09 |
| Mpeg1         | 2156  | 99.74          | 99.36 | 98.72 | 97.45 | 88.63                                      | 100.00 | 99.61  | 99.09 | 97.79 | 89.32                                      | 100.00 | 99.86  | 99.72  | 98.76 | 90.19 |
| Inpp5k        | 2393  | 99.94          | 99.59 | 99.00 | 97.59 | 89.71                                      | 100.00 | 99.70  | 99.17 | 97.75 | 89.92                                      | 100.00 | 99.88  | 99.51  | 98.39 | 90.73 |
| 6430573F11Rik | 2804  | 99.71          | 99.48 | 99.13 | 97.51 | 90.08                                      | 100.00 | 99.82  | 99.64 | 98.38 | 91.10                                      | 100.00 | 99.94  | 99.75  | 98.74 | 91.82 |
| Cx3c1         | 2817  | 99.60          | 99.26 | 98.86 | 97.72 | 90.46                                      | 99.93  | 99.72  | 99.38 | 98.40 | 91.46                                      | 100.00 | 99.93  | 99.64  | 98.77 | 92.30 |
| Clrn2         | 2977  | 99.72          | 99.44 | 99.01 | 97.18 | 89.79                                      | 99.93  | 99.85  | 99.49 | 97.75 | 90.28                                      | 100.00 | 100.00 | 99.77  | 98.40 | 91.00 |
| Mpeg1         | 4278  | 99.74          | 99.36 | 98.72 | 97.57 | 88.51                                      | 100.00 | 99.61  | 99.09 | 97.92 | 89.19                                      | 100.00 | 99.86  | 99.72  | 98.90 | 90.19 |
| Acvr2b        | 4490  | 99.67          | 99.30 | 98.07 | 95.77 | 85.06                                      | 99.95  | 99.81  | 98.69 | 96.55 | 85.92                                      | 100.00 | 99.95  | 99.33  | 97.69 | 87.24 |
| Inpp5k        | 4727  | 99.94          | 99.59 | 99.00 | 97.53 | 89.65                                      | 100.00 | 99.70  | 99.17 | 97.69 | 89.86                                      | 100.00 | 99.88  | 99.57  | 98.33 | 90.73 |
| Clrn2         | 6111  | 99.72          | 99.44 | 98.94 | 97.11 | 89.79                                      | 99.93  | 99.85  | 99.42 | 97.68 | 90.28                                      | 100.00 | 100.00 | 99.77  | 98.40 | 91.00 |
| Cx3c1         | 7047  | 99.60          | 99.26 | 98.86 | 97.51 | 90.59                                      | 99.93  | 99.72  | 99.38 | 98.33 | 91.53                                      | 100.00 | 99.93  | 99.64  | 98.69 | 92.45 |
| 6430573F11Rik | 7121  | 99.71          | 99.48 | 99.19 | 97.45 | 90.08                                      | 100.00 | 99.82  | 99.70 | 98.32 | 91.10                                      | 100.00 | 99.94  | 99.81  | 98.68 | 91.95 |
| Acvr2b        | 9660  | 99.91          | 99.91 | 99.81 | 98.78 | 94.79                                      | 100.0  |        |       |       |                                            |        |        |        |       |       |
