# Supplementary material for: Long-read sequencing for fast and robust identification of correct genome-edited alleles: PCR-based and Cas9 capture methods
Source: PubMed Central journal article supplement (PMC10954187; doi:10.1371/journal.pgen.1011187), 2024-03-08
Supplement: pgen.1011187.s006.pdf [file pgen.1011187.s006.pdf]

| Gene Name            | Modification | No. of MI sessions | Injected embryos | Embryos lysed | % of lysis | No. Embryos transferred | No. recipient | No. of pups | No. weaned | No. mutant mice | Mutation rate (%) | No. F0 with desired mutation | Desired mutation rate (%) |
|----------------------|--------------|--------------------|------------------|---------------|------------|-------------------------|---------------|-------------|------------|-----------------|-------------------|------------------------------|---------------------------|
| <i>6430573F11Rik</i> | Flox         | 2                  | 531              | 136           | 25.61      | 395                     | 12            | 31          | 30         | 20              | 66.67             | 4                            | 13.33                     |
| <i>Cx3cl1</i>        | Flox         | 2                  | 397              | 109           | 27.46      | 277                     | 9             | 22          | 19         | 11              | 57.89             | 3                            | 15.79                     |
| <i>Hnf1a</i>         | Flox         | 2                  | 587              | 83            | 14.14      | 504                     | 13            | 88          | 83         | 7               | 8.43              | 1                            | 1.20                      |
| <i>Inpp5k</i>        | Flox         | 3                  | 897              | 282           | 31.44      | 616                     | 16            | 52          | 50         | 16              | 32.00             | 5                            | 10.00                     |
| <i>Mpeg1</i>         | Cre KI       | 3                  | 729              | 95            | 13.03      | 590                     | 15            | 97          | 91         | 49              | 53.85             | 4                            | 4.40                      |
| <i>Pam</i>           | Flox         | 1                  | 325              | 46            | 14.15      | 258                     | 7             | 26          | 25         | 10              | 40.00             | 2                            | 8.00                      |
| <i>Prdm8</i>         | Flox         | 1                  | 293              | 52            | 17.75      | 241                     | 6             | 39          | 34         | 4               | 11.76             | 2                            | 5.88                      |
| <i>Tgfbr3</i>        | Flox         | 2                  | 205              | 7             | 3.42       | 197                     | 5             | 29          | 29         | 18              | 62.07             | 5                            | 17.24                     |

**S6 Table.** Mice obtained from each microinjection session during the course of this study.

The table details the number of embryos used, the mice that were obtained and the mutation rates observed from each microinjection session during the course of this study.
