# Supplementary material for: Long-read sequencing for fast and robust identification of correct genome-edited alleles: PCR-based and Cas9 capture methods
Source: PubMed Central journal article supplement (PMC10954187; doi:10.1371/journal.pgen.1011187), 2024-03-08
Supplement: pgen.1011187.s007.pdf [file pgen.1011187.s007.pdf]

**S7 Table.** The sequences of sgRNAs, lssDNA templates, primers and probes employed in this study.

| Name                                     | Reagent type           | Sequence (5'-3')                                                                                                                                                                                                                                                                                                                                                                                                                                                                                                                                                                                                                                                                                                                                                                                                                                                                                                                                                                                                                                                                                                                                                                                                                                                       | Project            |
|------------------------------------------|------------------------|------------------------------------------------------------------------------------------------------------------------------------------------------------------------------------------------------------------------------------------------------------------------------------------------------------------------------------------------------------------------------------------------------------------------------------------------------------------------------------------------------------------------------------------------------------------------------------------------------------------------------------------------------------------------------------------------------------------------------------------------------------------------------------------------------------------------------------------------------------------------------------------------------------------------------------------------------------------------------------------------------------------------------------------------------------------------------------------------------------------------------------------------------------------------------------------------------------------------------------------------------------------------|--------------------|
| 6430573F11Rik_flox_lssDNA                | lssDNA donor           | TTGTTAACATGAAACCTGAATAATCCCTTTGTGTCCAGGAGGATCTGACCTGATCTCAATATAGCAAAGTACATTTTCAATGAGT<br>GGCGCAGTGAATGGCGAGCTCAGACCCGCCGGCG <u>ATAACTTCGTATAATGTATGCTATACGAAGTTAT</u> AAATAACAACAATAACAGC<br>CTGAAAGTTGAAAGTTAAAACCGCTTACATATCATACTGATTAGGCAGGAGTCAAATAAGTCATGCGACAGAGTGTGTATATTT<br>TAAATTTAGACAATAATGCATTGCATAGACCTCTATACAGAATGGACATTGAGTCATGTGAGTTGCTGATTGTGGGTTTTTTTTTT<br>TCATGGCAAAGTATGAAAGCCTGGCTGCCTTACCTCTATGGAGATGATAGCATCGAAGCCCTGGTCCCTAAAGGGAAGATTAAG<br>GTTGTGCATACCATGACTTACACCCCTCTATCCGGCAATCTCTACAGAGGCCACAGTAGTCACAGCCAGAGTATGGACTT<br>GGCTATTCACCTTAAGATACTTTCCAGTCCACAACCTGTAAGAGAAAAACAGCGTCACATGCTCCTTCCGGAACGATGCAA<br>GTTAATGTGTGCTGTAATGGATGAACCTTATAGTAAATGACCAAGATGCAACACTTCAGAGAACTACGATTGTTTCATACAC<br>AAGAGAGGAAATGTATGGAATATTTATTGAAGCATTGCCATGGAGCTCAGCACAGTAGCACACCTAATCTCATGAGCTGGCTC<br>ATCCCTGAGAAAAAAGCTATGACATCCGGAACTGGGTTAACCATGAGGGTCTGTTCTCATAGTGACTATGCATTTTA<br>CTTTGTGTGTGTGCTGTCTCAAATGTCTGTTCAATGGGTTTATCAATTTCTGACCTGTTGAACAAATTACTGTAACAATTT<br>TGAATGTCTATGAAAGAAAACTAGGCAACAAAATGTGGCTTTTAAAGAACACGACTGTGACTGAAAGAAAACTCTTCA <u>ATA</u><br><u>ACTTCGTATAATGTATGCTATACGAAGTTAT</u> GCGATCGCTCGACGGTACCCCGGAT AAGTCCAGATGATTTTGACATTCAT<br>TTCTAGTGGCAGAAGCCCAAGTATCCAATCAAAGACTGAGATCAAACATTATAGTATGATAGAGAGTAAACA | 6430573F11Rik flox |
| 6430573F11Rik_5_1                        | gRNA                   | GCTATTAACCTAAGAATGTG (PAM:TGG)                                                                                                                                                                                                                                                                                                                                                                                                                                                                                                                                                                                                                                                                                                                                                                                                                                                                                                                                                                                                                                                                                                                                                                                                                                         | 6430573F11Rik flox |
| 6430573F11Rik_5_2                        | gRNA                   | TTAGGTTAATAGCAGGTACA (PAM:AGG)                                                                                                                                                                                                                                                                                                                                                                                                                                                                                                                                                                                                                                                                                                                                                                                                                                                                                                                                                                                                                                                                                                                                                                                                                                         | 6430573F11Rik flox |
| 6430573F11Rik_3_1                        | gRNA                   | TGTTTCGTACTATGCAAGAA (PAM:GGG)                                                                                                                                                                                                                                                                                                                                                                                                                                                                                                                                                                                                                                                                                                                                                                                                                                                                                                                                                                                                                                                                                                                                                                                                                                         | 6430573F11Rik flox |
| 6430573F11Rik_3_2                        | gRNA                   | CTTGATGTAGCGAAACACA (PAM:TGG)                                                                                                                                                                                                                                                                                                                                                                                                                                                                                                                                                                                                                                                                                                                                                                                                                                                                                                                                                                                                                                                                                                                                                                                                                                          | 6430573F11Rik flox |
| Geno_6430573F11Rik_F1                    | primer                 | CCTTGAGCCAGGAGTTCAG                                                                                                                                                                                                                                                                                                                                                                                                                                                                                                                                                                                                                                                                                                                                                                                                                                                                                                                                                                                                                                                                                                                                                                                                                                                    | 6430573F11Rik flox |
| Geno_6430573F11Rik_R1                    | primer                 | ATCTGGGACCCAGGTAGGGTC                                                                                                                                                                                                                                                                                                                                                                                                                                                                                                                                                                                                                                                                                                                                                                                                                                                                                                                                                                                                                                                                                                                                                                                                                                                  | 6430573F11Rik flox |
| Geno_6430573F11Rik_F2                    | primer                 | GACAACGACCCCTCATGGTT                                                                                                                                                                                                                                                                                                                                                                                                                                                                                                                                                                                                                                                                                                                                                                                                                                                                                                                                                                                                                                                                                                                                                                                                                                                   | 6430573F11Rik flox |
| Geno_6430573F11Rik_R2                    | primer                 | TCTCATGACTGTGCGTGT                                                                                                                                                                                                                                                                                                                                                                                                                                                                                                                                                                                                                                                                                                                                                                                                                                                                                                                                                                                                                                                                                                                                                                                                                                                     | 6430573F11Rik flox |
| Geno_6430573F11Rik_F3                    | primer                 | ACCCACCTCTGGGACCTAAT                                                                                                                                                                                                                                                                                                                                                                                                                                                                                                                                                                                                                                                                                                                                                                                                                                                                                                                                                                                                                                                                                                                                                                                                                                                   | 6430573F11Rik flox |
| Geno_6430573F11Rik_R3                    | primer                 | CGAAGCCCTGGTCCCTAAAG                                                                                                                                                                                                                                                                                                                                                                                                                                                                                                                                                                                                                                                                                                                                                                                                                                                                                                                                                                                                                                                                                                                                                                                                                                                   | 6430573F11Rik flox |
| 6430573F11Rik_RNA_R                      | primer                 | TTGTTAACATGAAACCTGAATA                                                                                                                                                                                                                                                                                                                                                                                                                                                                                                                                                                                                                                                                                                                                                                                                                                                                                                                                                                                                                                                                                                                                                                                                                                                 | 6430573F11Rik flox |
| 6430573F11Rik_UNIV_copy_counting_forward | ddPCR primer           | GGTAGAGATTGCCCGAATAGAG                                                                                                                                                                                                                                                                                                                                                                                                                                                                                                                                                                                                                                                                                                                                                                                                                                                                                                                                                                                                                                                                                                                                                                                                                                                 | 6430573F11Rik flox |
| 6430573F11Rik_UNIV_copy_counting_reverse | ddPCR primer           | CGAAGCCCTGGTCCCTAAAG                                                                                                                                                                                                                                                                                                                                                                                                                                                                                                                                                                                                                                                                                                                                                                                                                                                                                                                                                                                                                                                                                                                                                                                                                                                   | 6430573F11Rik flox |
| 6430573F11Rik_UNIV_copy_counting_probe   | ddPCR probe            | TGTGAAGTCATGGTATGACAACCTTA                                                                                                                                                                                                                                                                                                                                                                                                                                                                                                                                                                                                                                                                                                                                                                                                                                                                                                                                                                                                                                                                                                                                                                                                                                             | 6430573F11Rik flox |
| 6430573F11Rik_MUT_copy_counting_forward  | ddPCR primer           | GGTCTGAGCTCGCCATCAG                                                                                                                                                                                                                                                                                                                                                                                                                                                                                                                                                                                                                                                                                                                                                                                                                                                                                                                                                                                                                                                                                                                                                                                                                                                    | 6430573F11Rik flox |
| 6430573F11Rik_MUT_copy_counting_reverse  | ddPCR primer           | CCCTTTGTGTCCAGGAGTCTG                                                                                                                                                                                                                                                                                                                                                                                                                                                                                                                                                                                                                                                                                                                                                                                                                                                                                                                                                                                                                                                                                                                                                                                                                                                  | 6430573F11Rik flox |
| 6430573F11Rik_MUT_copy_counting_probe    | ddPCR probe            | TGCGCCTACTCATTGAAAATGTACTTTGC                                                                                                                                                                                                                                                                                                                                                                                                                                                                                                                                                                                                                                                                                                                                                                                                                                                                                                                                                                                                                                                                                                                                                                                                                                          | 6430573F11Rik flox |
| Nano_6430573F11Rik_F3                    | Nanopore tailed primer | TTTCTGTTGGTGTGATATTGCACCCACCTCTGGGACCTAAT                                                                                                                                                                                                                                                                                                                                                                                                                                                                                                                                                                                                                                                                                                                                                                                                                                                                                                                                                                                                                                                                                                                                                                                                                              | 6430573F11Rik flox |
| Nano_6430573F11Rik_R2                    | Nanopore tailed primer | ACTTGCTGTGCTCTATCTTCTCTCATGCATCTGTGCGTGT                                                                                                                                                                                                                                                                                                                                                                                                                                                                                                                                                                                                                                                                                                                                                                                                                                                                                                                                                                                                                                                                                                                                                                                                                               | 6430573F11Rik flox |
| Nano_Acvr2b_F1                           | Nanopore tailed primer | TTTCTGTTGGTGTGATATTGCGTGCCAGTGAGATTGAGGTGC                                                                                                                                                                                                                                                                                                                                                                                                                                                                                                                                                                                                                                                                                                                                                                                                                                                                                                                                                                                                                                                                                                                                                                                                                             | WT Nanopore trial  |
| Nano_Acvr2b_R1                           | Nanopore tailed primer | ACTTGCTGTGCTCTATCTTCAAGTAGAGAGCCAGGTTTGGTG                                                                                                                                                                                                                                                                                                                                                                                                                                                                                                                                                                                                                                                                                                                                                                                                                                                                                                                                                                                                                                                                                                                                                                                                                             | WT Nanopore trial  |
| Nano_Cln2_F1                             | Nanopore tailed primer | TTTCTGTTGGTGTGATATTGCACGAGCTCACTCAACCCCTAA                                                                                                                                                                                                                                                                                                                                                                                                                                                                                                                                                                                                                                                                                                                                                                                                                                                                                                                                                                                                                                                                                                                                                                                                                             | WT Nanopore trial  |
| Nano_Cln2_R1                             | Nanopore tailed primer | ACTTGCTGTGCTCTATCTTCTGAAGTCCGCCTTTGACCA                                                                                                                                                                                                                                                                                                                                                                                                                                                                                                                                                                                                                                                                                                                                                                                                                                                                                                                                                                                                                                                                                                                                                                                                                                | WT Nanopore trial  |
| Cx3cl1_flox_lssDNA                       | lssDNA donor           | AGCTCTCCACCTCCTCACCCTGCTGCTACCCATCTCTGCTGGAGTCTGGATCCTGCTAGTAGGCCACTTCCCTCAACCTCC<br>CCATGGGATCTAAGTGAATGGCGAGCTCAGACCCGCCGGCG <u>ATAACTTCGTATAATGTATGCTATACGAAGTTAT</u> CCATCCAGGAAA<br>CCATTTCCACCTCTGTTGTTTACCAGTCTTAAGGTGAGGAGGATAGCCTGTGGGCTGAAACAAGGCCACACTTACTA<br>AGGCCCTTTGGCAGGAAGCCAGGGTGAGGAGGGGGAGAGGGAGGGCTGGAATGTCTAGGGCTCTGGGGTTGAAAGGGAT<br>ACCTACACAATGGCACGCTTGGCCGAGGACTCTGGTTTACTGCTGATAGCGGATGAGCAAAGCCACTGGGATTCTGAGGATCATCT<br>TGTCGCATGATTTGCGATTTGCTCATGCCGAGGTGCTGACCTGGATCCACAGAGGCCAGCAGTCAGTAGGACCCCTGGGCATC<br>TGGTGCCCATACCCATTTGAGCTCTCGAGGCTACTCCCAAGCCAGAATCCACATCTAACCCACCCGTGATAAACCCTGCCAGA<br>CAGCAAGAGTCTCAGCCTCTGGGGTTGTTGGACTGATAAAAAATAGCCTTTATTAATAATCTCATTTGCTGATACCTGGGA<br>ATCATTTCATTTTGTGTTGTTGTTGTTGTTATTTGAGACAAGGTCTAGGTAGCTCTGGTATCCTGGTACTCATTAAAGACAA<br>TCAGACTGGCTTTGAGCTCATCAAGTCTGCTTGCCTGCTCCCAAGTCTGGGATTAAGATGCGGACCACAACCTCTGGCCT<br>GGAAACGTTTAAAT <u>ATAACTTCGTATAATGTATGCTATACGAAGTTAT</u> GCGATCGCTCGACGGTACCCCGGATACCCCTACG<br>GCATTGCCTCTGCTCATCCCTGCTGTGTGCTCAATTAAGTCAAGGGCTCAGCAATCACCTACACATGCATCTCTCTCCAC<br>ACAC                                                                                                                                                                            | 6430573F11Rik flox |
| Cx3cl1_5_1                               | gRNA                   | CAATGCCGTAGGGGTGAAAC (PAM:AGG)                                                                                                                                                                                                                                                                                                                                                                                                                                                                                                                                                                                                                                                                                                                                                                                                                                                                                                                                                                                                                                                                                                                                                                                                                                         | Cx3cl1 flox        |

|                                           |                        |                                                                                                                                                                                                                                                                                                                                                                                                                                                                                                                                                                                                                                                                                                                                                                                                                                                                                              |                    |
|-------------------------------------------|------------------------|----------------------------------------------------------------------------------------------------------------------------------------------------------------------------------------------------------------------------------------------------------------------------------------------------------------------------------------------------------------------------------------------------------------------------------------------------------------------------------------------------------------------------------------------------------------------------------------------------------------------------------------------------------------------------------------------------------------------------------------------------------------------------------------------------------------------------------------------------------------------------------------------|--------------------|
| <i>Cx3cl1_5_2</i>                         | gRNA                   | CATAGCGGGGAGAGGAATCT (PAM:AGG)                                                                                                                                                                                                                                                                                                                                                                                                                                                                                                                                                                                                                                                                                                                                                                                                                                                               | <i>Cx3cl1</i> flox |
| <i>Cx3cl1_3_1</i>                         | gRNA                   | TGGATGGCTCACCGTGGTTC (PAM:AGG)                                                                                                                                                                                                                                                                                                                                                                                                                                                                                                                                                                                                                                                                                                                                                                                                                                                               | <i>Cx3cl1</i> flox |
| <i>Cx3cl1_3_2</i>                         | gRNA                   | CCTCCCCATGGGATCTAGT (PAM:GGG)                                                                                                                                                                                                                                                                                                                                                                                                                                                                                                                                                                                                                                                                                                                                                                                                                                                                | <i>Cx3cl1</i> flox |
| Geno_ <i>Cx3cl1</i> _F1                   | primer                 | ACAACGCAGGCCGATAGAAA                                                                                                                                                                                                                                                                                                                                                                                                                                                                                                                                                                                                                                                                                                                                                                                                                                                                         | <i>Cx3cl1</i> flox |
| Geno_ <i>Cx3cl1</i> _R1                   | primer                 | ACTCGGGACTGAGCAAACAG                                                                                                                                                                                                                                                                                                                                                                                                                                                                                                                                                                                                                                                                                                                                                                                                                                                                         | <i>Cx3cl1</i> flox |
| Geno_ <i>Cx3cl1</i> _F2                   | primer                 | GAAACACAGGGGATCTGCTC                                                                                                                                                                                                                                                                                                                                                                                                                                                                                                                                                                                                                                                                                                                                                                                                                                                                         | <i>Cx3cl1</i> flox |
| Geno_ <i>Cx3cl1</i> _R2                   | primer                 | ATCATTCTGCACGGCTGA                                                                                                                                                                                                                                                                                                                                                                                                                                                                                                                                                                                                                                                                                                                                                                                                                                                                           | <i>Cx3cl1</i> flox |
| <i>Cx3cl1</i> _RNA_R                      | primer                 | AGCTCCTCCACTCCTCTCA                                                                                                                                                                                                                                                                                                                                                                                                                                                                                                                                                                                                                                                                                                                                                                                                                                                                          | <i>Cx3cl1</i> flox |
| Geno_ <i>Cx3cl1</i> _R3                   | primer                 | ACTGACTGAGCCTGTTTCCTC                                                                                                                                                                                                                                                                                                                                                                                                                                                                                                                                                                                                                                                                                                                                                                                                                                                                        | <i>Cx3cl1</i> flox |
| Geno_Int_ <i>Cx3cl1</i> _F4               | primer                 | TGCTGGCAGGTTATCACGG                                                                                                                                                                                                                                                                                                                                                                                                                                                                                                                                                                                                                                                                                                                                                                                                                                                                          | <i>Cx3cl1</i> flox |
| Geno_Int_ <i>Cx3cl1</i> _R4               | primer                 | GCTGACCTGGATCCACAGAG                                                                                                                                                                                                                                                                                                                                                                                                                                                                                                                                                                                                                                                                                                                                                                                                                                                                         | <i>Cx3cl1</i> flox |
| <i>Cx3cl1</i> _UNIV_copy_counting_forward | ddPCR primer           | CGGCATGACGAAATGCGAAATC                                                                                                                                                                                                                                                                                                                                                                                                                                                                                                                                                                                                                                                                                                                                                                                                                                                                       | <i>Cx3cl1</i> flox |
| <i>Cx3cl1</i> _UNIV_copy_counting_reverse | ddPCR primer           | GCAGGACTCCTGTTTAGCT                                                                                                                                                                                                                                                                                                                                                                                                                                                                                                                                                                                                                                                                                                                                                                                                                                                                          | <i>Cx3cl1</i> flox |
| <i>Cx3cl1</i> _UNIV_copy_counting_probe   | ddPCR probe            | TGTGCGACAAGATGACCTCACGA                                                                                                                                                                                                                                                                                                                                                                                                                                                                                                                                                                                                                                                                                                                                                                                                                                                                      | <i>Cx3cl1</i> flox |
| Nano_ <i>Cx3cl1</i> _F1                   | Nanopore tailed primer | TTTGTGTGGTCTGATATTGCACAACGCAGGCCGATAGAAA                                                                                                                                                                                                                                                                                                                                                                                                                                                                                                                                                                                                                                                                                                                                                                                                                                                     | <i>Cx3cl1</i> flox |
| Nano_ <i>Cx3cl1</i> _R1                   | Nanopore tailed primer | ACTTGCTGTCTCTATCTTCACTCGGACTGAGCAAACAG                                                                                                                                                                                                                                                                                                                                                                                                                                                                                                                                                                                                                                                                                                                                                                                                                                                       | <i>Cx3cl1</i> flox |
| LoxP F                                    | genotyping primer      | ATCGGGGGTACC GGTGCGAG                                                                                                                                                                                                                                                                                                                                                                                                                                                                                                                                                                                                                                                                                                                                                                                                                                                                        | Generic            |
| LoxP R                                    | genotyping primer      | ACTGATGGCGAGCTCAGACC                                                                                                                                                                                                                                                                                                                                                                                                                                                                                                                                                                                                                                                                                                                                                                                                                                                                         | Generic            |
| Cre_F1                                    | genotyping primer      | CGTTTTCTGAGCATACCTGGA                                                                                                                                                                                                                                                                                                                                                                                                                                                                                                                                                                                                                                                                                                                                                                                                                                                                        | Generic            |
| Cre_R1                                    | genotyping primer      | ATTCTCCACCGTCAGTAGC                                                                                                                                                                                                                                                                                                                                                                                                                                                                                                                                                                                                                                                                                                                                                                                                                                                                          | Generic            |
| Cre_F2                                    | genotyping primer      | AAACGTTGATGCCGTTGAAC                                                                                                                                                                                                                                                                                                                                                                                                                                                                                                                                                                                                                                                                                                                                                                                                                                                                         | Generic            |
| Cre_F3                                    | genotyping primer      | CGCGCTGGAGTTCAATACC                                                                                                                                                                                                                                                                                                                                                                                                                                                                                                                                                                                                                                                                                                                                                                                                                                                                          | Generic            |
| Cre_copy_counting_forward                 | ddPCR primer           | CGCAAGAACCTGATGGACATG                                                                                                                                                                                                                                                                                                                                                                                                                                                                                                                                                                                                                                                                                                                                                                                                                                                                        | Generic            |
| Cre_copy_counting_reverse                 | ddPCR primer           | ACCGGCAAAACGGACAGAA                                                                                                                                                                                                                                                                                                                                                                                                                                                                                                                                                                                                                                                                                                                                                                                                                                                                          | Generic            |
| Cre_copy_counting_probe                   | ddPCR probe            | TTCAGGGATCGCCAGGCGTTT                                                                                                                                                                                                                                                                                                                                                                                                                                                                                                                                                                                                                                                                                                                                                                                                                                                                        | Generic            |
| <i>Dot1l</i> _copy_counting_forward       | ddPCR reference assay  | GCCCCAGCACGACCATT                                                                                                                                                                                                                                                                                                                                                                                                                                                                                                                                                                                                                                                                                                                                                                                                                                                                            | Generic            |
| <i>Dot1l</i> _copy_counting_reverse       | ddPCR reference assay  | TAGTTGGCATCCTTATGCTTCATC                                                                                                                                                                                                                                                                                                                                                                                                                                                                                                                                                                                                                                                                                                                                                                                                                                                                     | Generic            |
| <i>Dot1l</i> _copy_counting_probe         | ddPCR reference assay  | CCAGTCTCAAGTCG                                                                                                                                                                                                                                                                                                                                                                                                                                                                                                                                                                                                                                                                                                                                                                                                                                                                               | Generic            |
| <i>Hnf1a</i> _flox_issDNA                 | issDNA donor           | TCTGTGTCTCATTATATAATGATCTCTCTCCATTCAGCAGAGAGTGAGTTCCTGGAGGGAGGACCCAGTGTGTGTACCCATTCTGCTTCCCTTACTGACTGATGGCGAGCTCAGACCCGCGGGATAAAGTTTCGATAATGTATGCTATACGAAGTTATAGAAAAGTCTGAGGACGCTTTCTGGCCCTCTCAGTCTCATGTGTCTGTGAGATGGAAGAGGGGGTGACACTGCCACCCTATGAGCTATGGGACGACCCCTCTGAGGCCCTGGCAAGGGAGGAGGACCCAGGCTGGGGTCTTACTACGCTGAGCCACCTCTCGCTGCTTGCAGGACGTACCAGGTGTACAGAGCGGCCGCTTCTGTGTCTCATGGTGTGCCCTTGTGAGGTGCTGTGACAGGTGGGACTGGTTGAGACCGTGGTGTCCACCACCTCCCGTGGGGATGTTGTGCTGCTGCAAGTACGACTTGACCATCTTCGCCACGCGCCATGGGTCTCCTGGGGGAGCAGGGGAGCAATGACCGGGTCTGCTCAATGGCCCTTCTGACATCTTAGGTGAGGCTGGGGTCTGGAGACTAGGGCTTCTCTGTGGGTAGGACACATGTATACATGGACAGATCCCGCTAGAGGTTGTGCCAGCCAAGTAGGGAGGACCCCTCTCTCTGTGTAACCTGGAAGTGTATATGATGCTTTTTGAAGTATGTATAAAGTTTCGATAATGTATGCTATACGAAGTTATGCGATCGCCTCGACGCGGTACCCCGGATGTGTGAGCTCAGTTCTCCTTGACCTTTACATGGGTCCGGCAGATTGAACTCAAGCCACTAGGCTTCTGACGAAGGGCTTACTCTGCAAGCCATCC | <i>Hnf1a</i> flox  |
| <i>Hnf1a</i> _5_1                         | gRNA                   | GCACATGTATGCACCTTGCCT (PAM:GGG)                                                                                                                                                                                                                                                                                                                                                                                                                                                                                                                                                                                                                                                                                                                                                                                                                                                              | <i>Hnf1a</i> flox  |
| <i>Hnf1a</i> _5_2                         | gRNA                   | TGCACATGTATGCACCTTGCCT (PAM:TGG)                                                                                                                                                                                                                                                                                                                                                                                                                                                                                                                                                                                                                                                                                                                                                                                                                                                             | <i>Hnf1a</i> flox  |
| <i>Hnf1a</i> _3_1                         | gRNA                   | CCCTTGGCACCTTGTGCAA (PAM:AGG)                                                                                                                                                                                                                                                                                                                                                                                                                                                                                                                                                                                                                                                                                                                                                                                                                                                                | <i>Hnf1a</i> flox  |
| <i>Hnf1a</i> _3_2                         | gRNA                   | CCTTTTGACAAGGTGCAA (PAM:GGG)                                                                                                                                                                                                                                                                                                                                                                                                                                                                                                                                                                                                                                                                                                                                                                                                                                                                 | <i>Hnf1a</i> flox  |
| Geno_ <i>Hnf1a</i> _F1                    | primer                 | TCCATGGCATATTCTGTGTCAA                                                                                                                                                                                                                                                                                                                                                                                                                                                                                                                                                                                                                                                                                                                                                                                                                                                                       | <i>Hnf1a</i> flox  |
| Geno_ <i>Hnf1a</i> _R1                    | primer                 | TTGCAACGTCCTCCCTTAGAC                                                                                                                                                                                                                                                                                                                                                                                                                                                                                                                                                                                                                                                                                                                                                                                                                                                                        | <i>Hnf1a</i> flox  |
| Geno_ <i>Hnf1a</i> _F2                    | primer                 | TCTGTGTCAGTTTCACTTTGGGTT                                                                                                                                                                                                                                                                                                                                                                                                                                                                                                                                                                                                                                                                                                                                                                                                                                                                     | <i>Hnf1a</i> flox  |
| Geno_ <i>Hnf1a</i> _R2                    | primer                 | CCTCCACCATCAGCTCAGT                                                                                                                                                                                                                                                                                                                                                                                                                                                                                                                                                                                                                                                                                                                                                                                                                                                                          | <i>Hnf1a</i> flox  |
| <i>Hnf1a</i> _RNA_R                       | primer                 | TCTGTGTCTCATTATATAAT                                                                                                                                                                                                                                                                                                                                                                                                                                                                                                                                                                                                                                                                                                                                                                                                                                                                         | <i>Hnf1a</i> flox  |
| <i>Hnf1a</i> _MUT5_copy_counting_forward  | ddPCR primer           | CGATCGCATAACTTCGTATAGCATACT                                                                                                                                                                                                                                                                                                                                                                                                                                                                                                                                                                                                                                                                                                                                                                                                                                                                  | <i>Hnf1a</i> flox  |
| <i>Hnf1a</i> _MUT5_copy_counting_reverse  | ddPCR primer           | CATGGACAGATCCCGCTAGAG                                                                                                                                                                                                                                                                                                                                                                                                                                                                                                                                                                                                                                                                                                                                                                                                                                                                        | <i>Hnf1a</i> flox  |

|                                          |                        |                                                                                                                                                                                                                                                                                                                                                                                                                                                                                                                                                                                                                                                                                                                                                                                                                                                                                                                                                                                                                                                                                                                                                                                                                                                                                                                                                                                                                                                                                                    |                    |
|------------------------------------------|------------------------|----------------------------------------------------------------------------------------------------------------------------------------------------------------------------------------------------------------------------------------------------------------------------------------------------------------------------------------------------------------------------------------------------------------------------------------------------------------------------------------------------------------------------------------------------------------------------------------------------------------------------------------------------------------------------------------------------------------------------------------------------------------------------------------------------------------------------------------------------------------------------------------------------------------------------------------------------------------------------------------------------------------------------------------------------------------------------------------------------------------------------------------------------------------------------------------------------------------------------------------------------------------------------------------------------------------------------------------------------------------------------------------------------------------------------------------------------------------------------------------------------|--------------------|
| <i>Hnf1a</i> _MUT5_copy_counting_probe   | ddPCR probe            | AGCATCATATAAACACTTCCAGGTTACGCAGA                                                                                                                                                                                                                                                                                                                                                                                                                                                                                                                                                                                                                                                                                                                                                                                                                                                                                                                                                                                                                                                                                                                                                                                                                                                                                                                                                                                                                                                                   | <i>Hnf1a</i> flox  |
| <i>Hnf1a</i> _MUT3_copy_counting_forward | ddPCR primer           | GGCGTCCTCAGACTTCTATAACTTC                                                                                                                                                                                                                                                                                                                                                                                                                                                                                                                                                                                                                                                                                                                                                                                                                                                                                                                                                                                                                                                                                                                                                                                                                                                                                                                                                                                                                                                                          | <i>Hnf1a</i> flox  |
| <i>Hnf1a</i> _MUT3_copy_counting_reverse | ddPCR primer           | TGCTTCCTCCCTTGACTGATG                                                                                                                                                                                                                                                                                                                                                                                                                                                                                                                                                                                                                                                                                                                                                                                                                                                                                                                                                                                                                                                                                                                                                                                                                                                                                                                                                                                                                                                                              | <i>Hnf1a</i> flox  |
| <i>Hnf1a</i> _MUT3_copy_counting_probe   | ddPCR probe            | AAGTTATCGCCGGCGGGTCTGA                                                                                                                                                                                                                                                                                                                                                                                                                                                                                                                                                                                                                                                                                                                                                                                                                                                                                                                                                                                                                                                                                                                                                                                                                                                                                                                                                                                                                                                                             | <i>Hnf1a</i> flox  |
| <i>Hnf1a</i> _UNIV_copy_counting_forward | ddPCR primer           | CACCACGGGTCTCAACCA                                                                                                                                                                                                                                                                                                                                                                                                                                                                                                                                                                                                                                                                                                                                                                                                                                                                                                                                                                                                                                                                                                                                                                                                                                                                                                                                                                                                                                                                                 | <i>Hnf1a</i> flox  |
| <i>Hnf1a</i> _UNIV_copy_counting_reverse | ddPCR primer           | GCCCGCTTCTGTGCTTCA                                                                                                                                                                                                                                                                                                                                                                                                                                                                                                                                                                                                                                                                                                                                                                                                                                                                                                                                                                                                                                                                                                                                                                                                                                                                                                                                                                                                                                                                                 | <i>Hnf1a</i> flox  |
| <i>Hnf1a</i> _UNIV_copy_counting_probe   | ddPCR probe            | CCCACCTGTCACAGCACCTCAA                                                                                                                                                                                                                                                                                                                                                                                                                                                                                                                                                                                                                                                                                                                                                                                                                                                                                                                                                                                                                                                                                                                                                                                                                                                                                                                                                                                                                                                                             | <i>Hnf1a</i> flox  |
| Nano_ <i>Hnf1a</i> _F1                   | Nanopore tailed primer | TTTCTGTTGGTGCTGATATTGCTCCATGGCATATTCTGTGTCAA                                                                                                                                                                                                                                                                                                                                                                                                                                                                                                                                                                                                                                                                                                                                                                                                                                                                                                                                                                                                                                                                                                                                                                                                                                                                                                                                                                                                                                                       | <i>Hnf1a</i> flox  |
| Nano_ <i>Hnf1a</i> _R1                   | Nanopore tailed primer | ACTTGCCTGTCGCTCTATCTTCTTGCAACGTCCTCCCTTAGAC                                                                                                                                                                                                                                                                                                                                                                                                                                                                                                                                                                                                                                                                                                                                                                                                                                                                                                                                                                                                                                                                                                                                                                                                                                                                                                                                                                                                                                                        | <i>Hnf1a</i> flox  |
| <i>Inpp5k</i> _flox_ssDNA                | IssDNA donor           | TAGCAAGTGCTACACTCAAGAGATTTATGCTGGGCAGTAAGGAGAGACAGAGGGTAGGCCAGGAATAAGACTGAGAAAACA<br>TCTAGGTGTGAAGCTAAACTGATGGCGAGCTCAGACCCGCCGGCG <u>ATAACTTCGTATAATGTATGCTATACGAAGTTATAGCCAA</u><br>GTGTAGTGTGAGCTTTAAACCTTTTGTGAATGGAAAAGAACATGAAAAGCCAAGTGAAGAAAAGAGGAGTACATCAGACAAAC<br>ACTTAGCTGCATGGGAGAAAAGGAAACGCATCAGACAAGCGACTCAAGTCAGCGCAGGTGAAACACATTCCTCCACTGCCAGA<br>AATTTAACTTACCTTGACAAAGTTTCAGTGGGGAAAGCATATCCATGAAGAGACTGCTCCATGGGTCTTCAAAGCAGCATCAGAA<br>AGAAGGCTTATGATTTCAAATTCATTCTGCAAACTGACCATTCCAAGGCAGAGGATCACCCCTGGCCTGGAGGATACTGACTC<br>TCCCACAGCCATCATCAGACTCTCAGGCTGCAATCTGAAGACCAAGAGGCTCCCTTCTAGCTGTGTGGCTGTTGACCTCCAA<br>CCCATAACCAATTGCTGACCCAGGACAAGAAACACAAGACTGGACCCAGGGAGGATGAAAGCTCCTCCCTTCAGACTTAACACA<br>AGCGAGGACAGGTTACATCAGCCCTCTACAGGGATAGGGGGTGCAGGGGCCCTTCAGACACTTACCAATGATATATATGTCCA<br>GATTAGGCTCTTGGTTGTTGAGTTGAAGTAGGTCAGGCTACAGTGGGGCTGCGGAGGCCACATTCACGTCACAACATG<br>TACGCTGTGGAAGGATGTTAAGTACAGGGGATGGAGGCTAAGATTTTTCCAGATAGCAGGCAAAGACCTAGGTATGTGCAAG<br>GCTTCGCTGCAGTGATCATGGGAAATGTGTGATGTTTGTGTTGGTGTCTTTGAGGCTGTGCTCACTATGCAGCCCTGG<br>CTGGCTCAACTCCTTACGGAGATCAGCCTTCTTGCCTCCTAAATTCTGAGATTAACGTTGTTAATCTCACTATGCCAGCTTGCT<br>TCTGCATCGTGTGGTAGGAAAGAGGAAAAGGAGCAGTGGATTACCCAGCTTTCACCTTCCCTTTCATGCCTGGAAGCAGGAATC<br>TCTTCCCTCCCTCAACTGGCTTCTTAGGCAGGTTTACAG <u>ATAACTTCGTATAATGTATGCTATACGAAGTTATGCGATCGCCTCG</u><br><u>ACGCGGTACCCCGGAT</u> GAAAGAATGATTGCGTTTGAGAGACAGGAACCTATTAGCCCTCCAGCTACAGAAACCTCACTCATCC<br>TCTGTGGCCAGTCAGCAACTCTGCATGCTTA | <i>Inpp5k</i> flox |

|                                           |                        |                                            |                    |
|-------------------------------------------|------------------------|--------------------------------------------|--------------------|
| <i>Inpp5k</i> _5_1                        | gRNA                   | TGCCAGGTACTGCCAGCTAT (PAM:GGG)             | <i>Inpp5k</i> flox |
| <i>Inpp5k</i> _5_2                        | gRNA                   | GGTTTACAGTCGCCCATAGC (PAM:TGG)             | <i>Inpp5k</i> flox |
| <i>Inpp5k</i> _3_1                        | gRNA                   | CTAGGTGTGAAGCTAACCCC (PAM:TGG)             | <i>Inpp5k</i> flox |
| <i>Inpp5k</i> _3_2                        | gRNA                   | AGTCTGAGCGATGAGTCCAG (PAM:GGG)             | <i>Inpp5k</i> flox |
| Geno_ <i>Inpp5k</i> _F1                   | primer                 | GCAGGATTTGTTGTGCGCA                        | <i>Inpp5k</i> flox |
| Geno_ <i>Inpp5k</i> _R1                   | primer                 | TTCGGATCTTGGAGAGCCC                        | <i>Inpp5k</i> flox |
| <i>Inpp5k</i> _RNA_R                      | primer                 | TAGCAAGTCTCAACTCAAGAG                      | <i>Inpp5k</i> flox |
| <i>Inpp5k</i> _UNIV_copy_counting_forward | ddPCR primer           | AGCAAGCTGGGCATAGTGAG                       | <i>Inpp5k</i> flox |
| <i>Inpp5k</i> _UNIV_copy_counting_reverse | ddPCR primer           | GGCTGGCCTCAACTCCTTA                        | <i>Inpp5k</i> flox |
| UPL_Probe 29                              | ddPCR probe            | GGCAGAAG                                   | <i>Inpp5k</i> flox |
| Nano_ <i>Inpp5k</i> _F1                   | Nanopore tailed primer | TTTCTGTTGGTGCTGATATTGCGCAGGATTTGTTGTGTGCCA | <i>Inpp5k</i> flox |
| Nano_ <i>Inpp5k</i> _R1                   | Nanopore tailed primer | ACTTGCCTGTCGCTCTATCTTCTCGGATCTTGGAGAGCCC   | <i>Inpp5k</i> flox |

Mpeg1\_Cre\_ssDNA

IssDNA donor

GCCTAAGAAAATACTGCCAGGGTTGTAATAGTCTCTTCTCTATGGCGACTGTCACCTCAGTCACTTAGGAAGGCAGAAGTAG Mpeg1 Cre KI  
 AGAAAACAAAGCAAAGATGTGCTTGAAGCTGGCTGGAACTGTTCCCTTGGAGACAATCAATCGCCATCTTCAGCAGGC  
 GCACCATTGCCCTGTTCACTATCCAGGTTACGGATATAGTTCATGACAATATTTACATTGGTCCAGCCACCAGCTTGCATGA  
 TCTCCGGTATTGAACTCCAGCGCGGCCATATCTCGCGCGCTCCGACACGGGCACTGTGTCAGACCAGGCCAGGTATCTC  
 TGACCAGAGTATCCTTAGCGCCGTAATCAATCGATGAGTTGCTTCAAAAATCCCTTCCAGGGCGCGAGTTGATAGCTGGCT  
 GGTGGCAGATGGCGCGCAACACCAATTTTTCTGACCCGGCAAACAGGTAGTTATTCGGATCATCAGCTACCCAGAGACG  
 GAAATCCATCGCTCGACCAGTTTGTACCCAGGCTAAGTGCCTTCTACACCTGCGGTGCTAACCCAGCTTTTCTGTTCTG  
 CCAATATGGATTAACATTTCTCCACCGTCAGTACGTGAGATATCTTAAACCTGATCTGGCAATTCGGCTATACGTAACAGG  
 GTGTTATAAGCAATCCCAGAAATGCCAGATTACGTATATCTTGGCAGCGATCGTATTTTCCATGAGTGAAACAACTGGTC  
 GAAATCAGTGCCTTGAACGCTAGAGCTGTTTTGCACGTTACCGGCATCAACGTTTTCTTTTCGGATCCGCCGATAACCAG  
 TGAAACAGCATTGCTGCACTTGGTCTGCGCAGCCGGACCGACGATGAAGCATGTTTGTAGCTGGCCAAATGTTGCTGGATA  
 GTTTTTACTGCCAGACCAGCGCTGAAGATATAGAAGATAATCGCGAACATCTTCAAGTTCTGCGGGAAACATTTCCGGTT  
 ATCAACTTGCAACATGCGCCACGACCGGCAACGAGCAGAAAGCATTTCAGGTATGCTCAGAAAACGCCTGGCGATCC  
 CTGAACATGTCCATCAGGTTCTTGCAGCCTCATCACTCGTTGATCGACCGGTAATGCAGGCAAAATTTGGTGTACGGTCA  
 TAAATTGGACATGGTTGTGGCAAGCTTATCATCGTGTCTTCAAAGGAAAACACGTCCTCCGTTGTTGGGGGCTAGACG  
 TTTTTAACCTCGACTAAACACATGTAAGCATGTGACCCGAGGCCAGATCAGATCCCATACAATGGGGTACCTTCTGGGG  
 ATCCTTCAAGCCCTTGTGAATACGCTTGAAGGAGCCATTTGACTCTTCCACAACCTTCAACTCACAACGTGGCAGTGGGG  
 TTGTGCCGCTTTGCAGGTGTATTTATACACGTGGCTTTTGGCCGAGAGGACCTGTCGCCAGTGGGGGTTCCGCTGCC  
 TGCAAAGGGTCTGACAGACGTTGTTGCTTCAAGAAGCTTCCAGAGAACTGCTTCTTCCAGACATTCAACAGACCTTGC  
 ATTCCTTTGGCGAGAGGGGAAAGACCCCTAGGAATGCTCGTCAAGAAGACAGGGCCAGGTTTCCGGGCCCTCACATTGCCAA  
 AAGACGGCAATATGGTGAATAACATATAGACAACGCACACCGCCCTTATTCGAAGCGGCTTCCGGCCAGTAACTGAG  
 GGGGGGGGAGGGAGAGGGGGGAATTCaggTTAAGCTGGACTTGGATCCTTCTCATTAAAGACTGTTGCATCTGTGTA  
 AGCTCCAACCAAACCTCTCTGCTCTCAATTTCTGGTATTCTTCTTGTACTCCGAGTACCATAGATGGCCAAGGTAATGA  
 CAACTCTAG

Mpeg1\_1  
 Mpeg1\_2  
 Geno\_Mpeg1\_F1  
 Geno\_Mpeg1\_R1  
 Geno\_Mpeg1\_F2  
 Geno\_Mpeg1\_R2  
 Mpeg1\_RNA\_R  
 Nano\_Mpeg1\_F1  
 Nano\_Mpeg1\_R1  
 Pam\_flox\_IssDNA

gRNA  
 gRNA  
 primer  
 primer  
 primer  
 primer  
 primer  
 Nanopore tailed primer  
 Nanopore tailed primer  
 IssDNA donor

TCCAGCTTAATTGTCTCAA (PAM:AGG)  
 GGAGACAATTAAGCTGGACT (PAM:TGG)  
 GTGGAAGCTGGGAGAACCCTC  
 GGGAGGGCACTGTCAATCAA  
 GGGAAAGCTGTGGAACTCACT  
 CTCCCGAACCCCGTTTTTA  
 GCCTAAGAAAATACTGCCAGGG  
 TTTCTGTTGGTCTGATATTGCGTGGAAAGCTGGGAGAACCCTC  
 ACTTGCCTGCTGCTATCTTCCGGAGGGCACTGTCAATCAA  
 TTCCTACTGTTGGATTACAGATGTGCCACTGTGTCTCGCTTTTGTACTAGTGTGGGATCTGAGCCAGGGCATCATGATT  
 TAGTGCCAAGCACTACTGATGGCGAGCTCAGACCCGCGCGCG ATAACTTCGTATAATGTATGCTATACGAAGTTATTATGAAAGA  
 GAGGGAAGAAATATATGTGTGCATATGTGATTGGTTAAGGAAGCTAAAACATAATTGATTAATCATGTAGTTATGGGAGACACAA  
 AAAGGCAAATACAGAGCAGAAAACCTCTGGTACTCTGAGTTAAACATCAAACCTCACTTTGTGATGCCATGGATCATAAACCATG  
 TCGGATTTTACAGGAATTGGAATATTGGCTCTTCTGGGATAGTTCTGAACATATCTGGAGCCACATTCTGTGTACAGGTGATGAA  
 GGAACACTGCATGCTTGGCTTCCATGTAATACATAATGTACAAGTTGCACATTTTCATCACTAGATGTGCCGCTGTAGGGAGAGGAA  
 AGTAGACAGGACATCGAAAGTCTCGTAGCAAACCTTCTTAATGCAAGAAATGACCCTGTAAGTCTGCCATAGTGGACTC  
 AGTAGAGAAGAACTGCATCTAGTTTATATTTCTCATTAACAACTATCAGACTCCAAACATCAAAGATGATTTCCATCCAACACTG  
 AAGTATTGGTGTCTGGTTATTCTGTGACATCACCCAGGATCACAGATAAAAAATGATACTTAAGTAGTTTCAGAGATACAGGTTT  
 CCCCATTAATCCTTTTGTCTTATTTACCTACTGTGTTATAAAAACCTACACATAAATAATCCATTAATAACTTCGTATAATGTATGCT  
 ATACGAAGTTATGCGATCGCCTCGACGCGGTACCCCGGAT AACAATTTAGAATCATCTGGTGTCCAGTTTCTATCTGTGCTCT  
 CAAGAGAACTCCCTGACAAAAGCTGAAAAGGGGAGGAGATGGTATATTTTCAGC

Mpeg1 Cre KI  
 Mpeg1 Cre KI

Pam flox

Pam\_5\_1  
 Pam\_5\_2  
 Pam\_3\_1  
 Pam\_3\_2

gRNA  
 gRNA  
 gRNA  
 gRNA

TTTGCTTAGTGATGGCGTGA (PAM:TGG)  
 GTTTGTTCCAGTTACCAACT (PAM:TGG)  
 TGTTTTGATGGAAAAATGTC (PAM:AGG)  
 GTTTGATGGAAAAATGTCA (PAM:GGG)

Pam flox  
 Pam flox  
 Pam flox  
 Pam flox

|                          |                        |                                                                                                                                                                                                                                                                                                                                                                                                                                                                                                                                                                                                                                                                                                                                                                                                                                                                                                                                                                                                                                                                                                                                                                                                                                                                                                                                                               |                   |
|--------------------------|------------------------|---------------------------------------------------------------------------------------------------------------------------------------------------------------------------------------------------------------------------------------------------------------------------------------------------------------------------------------------------------------------------------------------------------------------------------------------------------------------------------------------------------------------------------------------------------------------------------------------------------------------------------------------------------------------------------------------------------------------------------------------------------------------------------------------------------------------------------------------------------------------------------------------------------------------------------------------------------------------------------------------------------------------------------------------------------------------------------------------------------------------------------------------------------------------------------------------------------------------------------------------------------------------------------------------------------------------------------------------------------------|-------------------|
| <i>Pam_RNA_R</i>         | primer                 | TTCTACTGTGGGATTACAG                                                                                                                                                                                                                                                                                                                                                                                                                                                                                                                                                                                                                                                                                                                                                                                                                                                                                                                                                                                                                                                                                                                                                                                                                                                                                                                                           | <i>Pam</i> flox   |
| <i>Geno_Pam_F1</i>       | primer                 | GCCTACAGCTCTTAGTATCCCC                                                                                                                                                                                                                                                                                                                                                                                                                                                                                                                                                                                                                                                                                                                                                                                                                                                                                                                                                                                                                                                                                                                                                                                                                                                                                                                                        | <i>Pam</i> flox   |
| <i>Geno_Pam_R1</i>       | primer                 | AGGCAAGATGTCAATGCTGGAT                                                                                                                                                                                                                                                                                                                                                                                                                                                                                                                                                                                                                                                                                                                                                                                                                                                                                                                                                                                                                                                                                                                                                                                                                                                                                                                                        | <i>Pam</i> flox   |
| <i>Nano_Pam_F1</i>       | Nanopore tailed primer | TTTCTGTTGGTGCTGATATTGCGCCTACAGCTCTTAGTATCCCC                                                                                                                                                                                                                                                                                                                                                                                                                                                                                                                                                                                                                                                                                                                                                                                                                                                                                                                                                                                                                                                                                                                                                                                                                                                                                                                  | <i>Pam</i> flox   |
| <i>Nano_Pam_R1</i>       | Nanopore tailed primer | ACTTGCCTGCTCTATCTTCAGGCAAGATGTCAATGCTGGAT                                                                                                                                                                                                                                                                                                                                                                                                                                                                                                                                                                                                                                                                                                                                                                                                                                                                                                                                                                                                                                                                                                                                                                                                                                                                                                                     | <i>Pam</i> flox   |
| <i>Prdm8_flox_1ssDNA</i> | 1ssDNA donor           | CCCCCAAAAATGAATACACTATCCTATTTGGTGCAACTACTTTCTGATTGTGCAATTACTAAGTCAAACGCTCCCCAACCTTTTC<br>TTCCCCCTCTGACTGATGGCGAGCTCAGACCCCGCGCGG <u>ATAACTTCGTATAATGTATGCTATACGAAGTTAT</u> CTCAGAAAGCTTC<br>GTCCACCCTATGATGTGCAAGGTGAGCCAGGCACCCGAGCCAACCTACCGTTCATTTTGTGAGCTCTAGACGGGCAGAGCAAGA<br>GCAATTCAGTCAGTCTTTCCCGTACCAAACCTAGTAACTCTTCACTTTGGCAATCCTGCGGAGAGAGCGGTAGAACAGCTGTCCA<br>TTTTTATATAAGCTTCGAGATTCGTCTTCCCTTATCTCGGGCTGATTGGACCAGCCGACCCACATGAGACCTTCTGAGGAACCA<br>TTTGCGCCGAAGTGTCTACCTACAGTATTTAAGAAAAGACAAGAAGAGAGGGATCCACGTGAAGACGGCAACCAGAGAAACCA<br>GAGATATTTCACTGTCTGGCTTTTGTCTTTCCAAACAATTATCTGAAACCAAGTTTGCAAAAAGTTGACCAAAGTCGAACCTGCATC<br>CCTGCATTTGTGTTCAATGGGCACAGTGGCCATCCTTTGCAATATTGGGTCACTTACAGAGTAGCCTCTTTAGAATCTCCCTTTC<br>AGTTACCTCACATGACAAAAGGAGAGGAAATTTCCCGTGTTCAGAAAGTAAAGGCAAGTTCGGGTCTTAGTAAATTTCTATGG<br>CACTACGCCCATCTTCTAACTGACATGAAGGACTAACAGCTTACTTTCATGATGAAAGACTAGGAACCTGCGGGTGGGGAAC<br>TGGGAGTAACATTTAGCATGTAATAAATAAATAAATAAATAAATAAATAAATAAATAAATAAATAAATAAATAAATAAATAAATAAATA<br>AAGCAATAATCAGGCGATGGGGAGACCTCCAGGTTACAAAATAAATAAATAAATAAATAAATAAATAAATAAATAAATAAATAAATAA<br>ATATGTAATAAGCCAGTACTAACCAAGTCTCCTTAGCAAATTTATAACTTCGTATAATGTATGCTATACGAAGTTATGCGATCGC<br>CTCGACGCGGTACCCCGGAT AGTACCGATTCAGGCAACCTTGGCATTGCTTTTTCTTTTCTCAGTAAAACTCATTGATGATTTG<br>AATCTAGTTTTCTTTCTAATTTTTGTTGTTCCTCTGCTCTGACTGCTCAGATG | <i>Prdm8</i> flox |
| <i>Prdm8_5_1</i>         | gRNA                   | CTGAATCGGTAAGTCTAGTTC (PAM:TGG)                                                                                                                                                                                                                                                                                                                                                                                                                                                                                                                                                                                                                                                                                                                                                                                                                                                                                                                                                                                                                                                                                                                                                                                                                                                                                                                               | <i>Prdm8</i> flox |
| <i>Prdm8_5_2</i>         | gRNA                   | GTTCTGGTCCCTAGATTA (PAM:GGG)                                                                                                                                                                                                                                                                                                                                                                                                                                                                                                                                                                                                                                                                                                                                                                                                                                                                                                                                                                                                                                                                                                                                                                                                                                                                                                                                  | <i>Prdm8</i> flox |
| <i>Prdm8_3_1</i>         | gRNA                   | GTGTTGTCCGAATGGAAC (PAM:AGG)                                                                                                                                                                                                                                                                                                                                                                                                                                                                                                                                                                                                                                                                                                                                                                                                                                                                                                                                                                                                                                                                                                                                                                                                                                                                                                                                  | <i>Prdm8</i> flox |
| <i>Prdm8_3_2</i>         | gRNA                   | CGAATGGAACTAGGACAGAA (PAM:GGG)                                                                                                                                                                                                                                                                                                                                                                                                                                                                                                                                                                                                                                                                                                                                                                                                                                                                                                                                                                                                                                                                                                                                                                                                                                                                                                                                | <i>Prdm8</i> flox |
| <i>Geno_Prmd8_F1</i>     | primer                 | AACGCCATATTCGGTCCCTG                                                                                                                                                                                                                                                                                                                                                                                                                                                                                                                                                                                                                                                                                                                                                                                                                                                                                                                                                                                                                                                                                                                                                                                                                                                                                                                                          | <i>Prdm8</i> flox |
| <i>Geno_Prmd8_R1</i>     | primer                 | CAGTTCGGGAGCCAAGTTGT                                                                                                                                                                                                                                                                                                                                                                                                                                                                                                                                                                                                                                                                                                                                                                                                                                                                                                                                                                                                                                                                                                                                                                                                                                                                                                                                          | <i>Prdm8</i> flox |
| <i>Geno_Prmd8_F2</i>     | primer                 | GCAGGGATGCAAGTTCGACTT                                                                                                                                                                                                                                                                                                                                                                                                                                                                                                                                                                                                                                                                                                                                                                                                                                                                                                                                                                                                                                                                                                                                                                                                                                                                                                                                         | <i>Prdm8</i> flox |
| <i>Geno_Prmd8_R2</i>     | primer                 | GAGCCAACCTACCGTTCATTT                                                                                                                                                                                                                                                                                                                                                                                                                                                                                                                                                                                                                                                                                                                                                                                                                                                                                                                                                                                                                                                                                                                                                                                                                                                                                                                                         | <i>Prdm8</i> flox |
| <i>Prdm8_RNA_R</i>       | primer                 | CCCCAAAAATGAATACACTATC                                                                                                                                                                                                                                                                                                                                                                                                                                                                                                                                                                                                                                                                                                                                                                                                                                                                                                                                                                                                                                                                                                                                                                                                                                                                                                                                        | <i>Prdm8</i> flox |
| <i>Nano_Prmd8_F1</i>     | Nanopore tailed primer | TTTCTGTTGGTGCTGATATTGCAACGCCATATTCGGTCCCTG                                                                                                                                                                                                                                                                                                                                                                                                                                                                                                                                                                                                                                                                                                                                                                                                                                                                                                                                                                                                                                                                                                                                                                                                                                                                                                                    | <i>Prdm8</i> flox |
| <i>Nano_Prmd8_R1</i>     | Nanopore tailed primer | ACTTGCCTGCTCTATCTTCAGTTCGGAGCCAAGTTGT                                                                                                                                                                                                                                                                                                                                                                                                                                                                                                                                                                                                                                                                                                                                                                                                                                                                                                                                                                                                                                                                                                                                                                                                                                                                                                                         | <i>Prdm8</i> flox |
| <i>Tgfb3_flox_1ssDNA</i> | 1ssDNA donor           | CTGGCCATAAACATTTGCGAGATCACAGGTAAAGAGTGCAGCCCACTGTCTAACCCATCCTGCCTCCTCAGTGATCCCTGGCA<br>CTGCTGTCCCTACTGATGGCGAGCTCAGACCCTCGGCGATAACTTCGTATAATGTATGCTATACGAAGTTATCTTAGCCACTT<br>GCTTACTCTGAATCTGTGGTTGACTGCTTCTAAATCTACACAACAACCTCTTCTCTCAGCTACACTGCTCCCTACCTCAGC<br>TGGTTATAACCAGCCCACTCCTGCAGAAGGAAAAACAAGGAGGTGGTGTAGGAGAAGAGTTCTCATGCCATCTCCTAGGTTCC<br>GCCAGTCCAGGACTCTGGAATCCTACCATGCCTGGCTGAGCACCTGGACTCAGAAAGGTAACAACCAACAGTTATAAACAT<br>TAACATCATTAAACAGAAGCCATGCAACATTTACCTTCTCCACTTAAATATAGATATTTCTGCTACTTAAAGTTCGGTGAATGAAGT<br>CACTGCTCCATATTCCTTTGGGCCAGTGTAGCAGATGCTCATTTTCTGAGGAAACTCCTTCTCCTGTTCTGCTGTCAAGGA<br>GAAAGTTCCTGATGAAAACCTGGACCACAGAACCTCCGAAACCTGGAACAAATAGAACTTATAGTTAAATATGACACAGTTACCCA<br>GAGTCAAACCAGACTTAGAGGGAGCCCTAGCTAGACTTACCATCATACTAATTTGTTTCTCTCTGACATGCAGGCAGATGT<br>GGACAGGGCAAGCTCCCTAAGAGCTGAATCAAGCAATCCAAGCCACTTCTTCCAGGTAACCCCAAGAAGACTTCCATAAAGA<br>TCAAACCTCTGAGTACTGGATAGTCTGTTTATATGTTGCCATGTCTGTGGACTGACCAGGAACACAGTACCTCTCTCAACACAT<br>ATGGATACCAGAGATAACTTCGTATAATGTATGCTATACGAAGTTATGCGATCGCCTCGACGCGGTACCCCGGATGACATTTAA<br>GGGAAACACAGCACCTCTCTGACAAACATGGACTTAAAAGTTTTAGCTATGCTATTTCTAATCAGTAAGTACTCTTTGCACAG<br>TATG                                                                                                                                                                               | <i>Tgfb3</i> flox |
| <i>Tgfb3_5_1</i>         | gRNA                   | TCCAGTTCTAGACCGCTC (PAM:TGG)                                                                                                                                                                                                                                                                                                                                                                                                                                                                                                                                                                                                                                                                                                                                                                                                                                                                                                                                                                                                                                                                                                                                                                                                                                                                                                                                  | <i>Tgfb3</i> flox |
| <i>Tgfb3_5_2</i>         | gRNA                   | ACCAGAGCCGTGCTAGAAC (PAM:TGG)                                                                                                                                                                                                                                                                                                                                                                                                                                                                                                                                                                                                                                                                                                                                                                                                                                                                                                                                                                                                                                                                                                                                                                                                                                                                                                                                 | <i>Tgfb3</i> flox |
| <i>Tgfb3_3_1</i>         | gRNA                   | AAGTGGCTAAGTGTGCGAGA (PAM:GGG)                                                                                                                                                                                                                                                                                                                                                                                                                                                                                                                                                                                                                                                                                                                                                                                                                                                                                                                                                                                                                                                                                                                                                                                                                                                                                                                                | <i>Tgfb3</i> flox |
| <i>Tgfb3_3_2</i>         | gRNA                   | CAAGTGGCTAAGTGTGCGAG (PAM:AGG)                                                                                                                                                                                                                                                                                                                                                                                                                                                                                                                                                                                                                                                                                                                                                                                                                                                                                                                                                                                                                                                                                                                                                                                                                                                                                                                                | <i>Tgfb3</i> flox |
| <i>Guide I</i>           | gRNA Cas9 capture      | CGACACAAAGCCTCGTGATC (PAM:AGG)                                                                                                                                                                                                                                                                                                                                                                                                                                                                                                                                                                                                                                                                                                                                                                                                                                                                                                                                                                                                                                                                                                                                                                                                                                                                                                                                | <i>Tgfb3</i> flox |
| <i>Guide M</i>           | gRNA Cas9 capture      | ATTTCCATTGACCTGTAGTC (PAM:AGG)                                                                                                                                                                                                                                                                                                                                                                                                                                                                                                                                                                                                                                                                                                                                                                                                                                                                                                                                                                                                                                                                                                                                                                                                                                                                                                                                | <i>Tgfb3</i> flox |
| <i>Guide N</i>           | gRNA Cas9 capture      | TGGGTTGAAGTACTCCGCA (PAM:AGG)                                                                                                                                                                                                                                                                                                                                                                                                                                                                                                                                                                                                                                                                                                                                                                                                                                                                                                                                                                                                                                                                                                                                                                                                                                                                                                                                 | <i>Tgfb3</i> flox |

|                                         |                        |                                |                   |
|-----------------------------------------|------------------------|--------------------------------|-------------------|
| <i>Guide O</i>                          | gRNA Cas9 capture      | CACGGTGCATACGTACTCTG (PAM:AGG) | <i>Tgfb3</i> flox |
| <i>Geno_Tgfb3_F1</i>                    | primer                 | CAGGGATGGCCTGAATATACCA         | <i>Tgfb3</i> flox |
| <i>Geno_Tgfb3_R1</i>                    | primer                 | ATCAGGTCACAGCGTTAGACAC         | <i>Tgfb3</i> flox |
| <i>Geno_Tgfb3_F2</i>                    | primer                 | TCCTCCTGCTGAGAAACCTGAA         | <i>Tgfb3</i> flox |
| <i>Geno_Tgfb3_R2</i>                    | primer                 | GTGGATCAGAGTACACCCACTT         | <i>Tgfb3</i> flox |
| <i>Tgfb3_RNA_R</i>                      | primer                 | CTGGCCTAAAACATTTGCAG           | <i>Tgfb3</i> flox |
| <i>Tgfb3_UNIV_copy_counting_forward</i> | ddPCR primer           | ACAGCAGAAACAGAGGAAAGG          | <i>Tgfb3</i> flox |
| <i>Tgfb3_UNIV_copy_counting_reverse</i> | ddPCR primer           | CGGTGAATGAAGTCACTGCT           | <i>Tgfb3</i> flox |
| <i>Tgfb3_UNIV_copy_counting_probe</i>   | ddPCR probe            | AATGAGCATCTGCTACACTGGGCC       | <i>Tgfb3</i> flox |
| <i>Nano_Tgfb3_F2</i>                    | Nanopore tailed primer | ACTTAACAAAGTCCCAGCCCT          | <i>Tgfb3</i> flox |
| <i>Nano_Tgfb3_R2</i>                    | Nanopore tailed primer | AGCAGCAATGAGCCTTGAA            | <i>Tgfb3</i> flox |
