# Supplementary material for: Long-read sequencing for fast and robust identification of correct genome-edited alleles: PCR-based and Cas9 capture methods
Source: PubMed Central journal article supplement (PMC10954187; doi:10.1371/journal.pgen.1011187), 2024-03-08
Supplement: pgen.1011187.s008.pdf [file pgen.1011187.s008.pdf]

**S8 Table.** The outcome of the Medaka analysis of reads that contain mutant specific sequences.

| Barcode | Locus                | Project type  | Animal                        | Outcome of Medaka analysis of paased reads |
|---------|----------------------|---------------|-------------------------------|--------------------------------------------|
| BC01    | <i>6430573F11Rik</i> | <i>N/A</i>    | WT                            | No annotation                              |
|         | <i>Acvr2b</i>        | <i>N/A</i>    | WT                            | No annotation                              |
| BC02    | <i>Clrn2</i>         | <i>N/A</i>    | WT                            | No annotation                              |
|         | <i>Inpp5k</i>        | <i>N/A</i>    | WT                            | No annotation                              |
| BC03    | <i>Cx3cl1</i>        | <i>N/A</i>    | WT                            | No annotation                              |
|         | <i>Mpeg1</i>         | <i>N/A</i>    | WT                            | No annotation                              |
| BC01    | <i>Mpeg1</i>         | <i>Cre KI</i> | <i>Mpeg1</i> -cre-80.1c       | No annotation                              |
| BC02    | <i>Mpeg1</i>         | <i>Cre KI</i> | <i>Mpeg1</i> -cre-75.1d       | No annotation                              |
| BC03    | <i>Mpeg1</i>         | <i>Cre KI</i> | <i>Mpeg1</i> -cre-75          | No annotation                              |
| BC04    | <i>Mpeg1</i>         | <i>Cre KI</i> | <i>Mpeg1</i> -cre-80          | No annotation                              |
| BC05    | <i>Cx3cl1</i>        | <i>Flox</i>   | <i>Cx3cl1</i> -flox-10.1c     | No annotation                              |
| BC06    | <i>Cx3cl1</i>        | <i>Flox</i>   | <i>Cx3cl1</i> -flox-10        | No annotation                              |
| BC07    | <i>Pam</i>           | <i>Flox</i>   | <i>Pam</i> -flox-3            | 813: T>C; q54                              |
| BC08    | <i>Pam</i>           | <i>Flox</i>   | <i>Pam</i> -flox-3.1a         | Not applicable as no passed reads          |
| BC09    | <i>Prdm8</i>         | <i>Flox</i>   | <i>Prdm8</i> -flox-7          | 1442:T>G; q66.2                            |
| BC10    | <i>Prdm8</i>         | <i>Flox</i>   | <i>Prdm8</i> -flox-31         | No annotation                              |
| BC11    | <i>Hnf1a</i>         | <i>Flox</i>   | <i>Hnf1a</i> -flox-66         | No annotation                              |
| BC12    | <i>Inpp5k</i>        | <i>Flox</i>   | <i>Inpp5k</i> -flox-33        | 440: C>T; q60.2                            |
| BC01    | <i>6430573F11Rik</i> | <i>Flox</i>   | <i>6430573F11Rik</i> -flox-11 | 616: G>A; q54                              |
| BC02    | <i>Inpp5k</i>        | <i>Flox</i>   | <i>Inpp5k</i> -flox-7         | Not applicable as no passed reads          |
| BC03    | <i>Inpp5k</i>        | <i>Flox</i>   | <i>Inpp5k</i> -flox-8.3d      | Not applicable as no passed reads          |
