# Supplementary material for: Long-read sequencing for fast and robust identification of correct genome-edited alleles: PCR-based and Cas9 capture methods
Source: PubMed Central journal article supplement (PMC10954187; doi:10.1371/journal.pgen.1011187), 2024-03-08
Supplement: pgen.1011187.s010.pdf [file pgen.1011187.s010.pdf]

**S10 Table.** Mouse colonies that were established during the course of this study.

| Gene Name            | Project Intention | Colony Name                    | Allele name                  | Allele type transmitted if different to project intention |
|----------------------|-------------------|--------------------------------|------------------------------|-----------------------------------------------------------|
| <i>6430573F11Rik</i> | Flox              | H-6430573F11Rik-DEL925-EM1-B6N | Trmt9b <sup>em1(IMPC)H</sup> | Deletion                                                  |
| <i>Cx3cl1</i>        | Flox              | H-CX3CL1-FLOX-EM1-B6N          | Cx3cl1 <sup>em1H</sup>       |                                                           |
| <i>Inpp5k</i>        | Flox              | INPP5K-DEL1152-EM1-B6N         | Inpp5k <sup>em1H</sup>       | Deletion                                                  |
| <i>Inpp5k</i>        | Flox              | INPP5K-DEL856INS3-EM2-B6N      | Inpp5k <sup>em2H</sup>       | Deletion                                                  |
| <i>Mpeg1</i>         | Cre KI            | MPEG1-CRE-EM1-B6N              | Mpeg1 <sup>em1H</sup>        |                                                           |
| <i>Mpeg1</i>         | Cre KI            | MPEG1-CRE-EM2-B6N              | Mpeg1 <sup>em2H</sup>        |                                                           |
| <i>Tgfbr3</i>        | Flox              | TGFBR3-FLOX-EM1-B6J            | Tgfbr3 <sup>em1H</sup>       |                                                           |
