# Supplementary material for: Long-read sequencing for fast and robust identification of correct genome-edited alleles: PCR-based and Cas9 capture methods
Source: PLoS Genet. 2024 Mar 8;20(3):e1011187. doi: 10.1371/journal.pgen.1011187 (PMC10954187; doi:10.1371/journal.pgen.1011187)
Supplement: S2 Table — This table summarises the percentage of WT sequence recall across a range of Filtlong threshold values with consensus thresholds ranging from 50% to 100%. (PDF) [file pgen.1011187.s002.pdf]

| Target        | Fitting threshold | Whole interval |        |         |       |       | Interval filtered for 5+ base homopolymers |        |        |        |       | Interval filtered for 4+ base homopolymers |        |        |        |        |       |       |      |
|---------------|-------------------|----------------|--------|---------|-------|-------|--------------------------------------------|--------|--------|--------|-------|--------------------------------------------|--------|--------|--------|--------|-------|-------|------|
|               |                   | 50%            | 60%    | 70%     | 80%   | 90%   | 100%                                       | 50%    | 60%    | 70%    | 80%   | 90%                                        | 100%   | 50%    | 60%    | 70%    | 80%   | 90%   | 100% |
| 6430573F11nRk | 84                | 99.98          | 99.83  | 99.71   | 99.30 | 96.75 | 0.35                                       | 100.00 | 100.00 | 100.00 | 99.70 | 97.53                                      | 0.36   | 100.00 | 100.00 | 100.00 | 99.87 | 98.11 | 0.38 |
| Acvr2b        | 84                | 99.91          | 99.81  | 99.78   | 99.49 | 94.69 | 0.28                                       | 100.00 | 100.00 | 99.92  | 95.29 | 0.27                                       | 100.00 | 100.00 | 100.00 | 99.59  | 96.50 | 0.31  |      |
| Clnr2         | 84                | 99.93          | 99.86  | 99.72   | 99.08 | 96.69 | 0.42                                       | 100.00 | 100.00 | 100.00 | 99.49 | 97.17                                      | 0.44   | 100.00 | 100.00 | 100.00 | 99.69 | 97.79 | 0.46 |
| Cxcl1         | 84                | 100.00         | 100.87 | 99.60   | 99.19 | 97.31 | 0.40                                       | 100.00 | 99.93  | 99.86  | 99.58 | 97.99                                      | 0.42   | 100.00 | 100.00 | 100.00 | 99.85 | 98.33 | 0.44 |
| InppSk        | 84                | 100.00         | 100.00 | 99.65   | 99.19 | 97.31 | 0.35                                       | 100.00 | 100.00 | 99.96  | 99.11 | 96.92                                      | 0.36   | 100.00 | 100.00 | 99.88  | 99.44 | 97.59 | 0.37 |
| Mpeg1         | 84                | 100.00         | 100.00 | 99.74   | 99.81 | 96.83 | 0.77                                       | 100.00 | 100.00 | 99.86  | 99.35 | 97.14                                      | 0.78   | 100.00 | 100.00 | 99.86  | 98.07 | 0.83  |      |
| 6430573F11nRk | 85                | 99.98          | 99.83  | 99.71   | 99.30 | 96.87 | 0.35                                       | 100.00 | 100.00 | 100.00 | 99.70 | 97.65                                      | 0.36   | 100.00 | 100.00 | 100.00 | 99.87 | 98.18 | 0.38 |
| Acvr2b        | 85                | 99.91          | 99.91  | 99.81   | 98.78 | 94.69 | 0.28                                       | 100.00 | 100.00 | 99.95  | 99.27 | 95.39                                      | 0.29   | 100.00 | 100.00 | 100.00 | 99.59 | 96.50 | 0.31 |
| Clnr2         | 85                | 99.93          | 99.86  | 99.72   | 99.08 | 96.76 | 0.42                                       | 100.00 | 100.00 | 100.00 | 99.49 | 97.24                                      | 0.44   | 100.00 | 100.00 | 100.00 | 99.69 | 97.86 | 0.46 |
| Cxcl1         | 85                | 100.00         | 100.87 | 99.60   | 99.19 | 97.31 | 0.40                                       | 100.00 | 99.93  | 99.86  | 99.58 | 97.99                                      | 0.42   | 100.00 | 100.00 | 100.00 | 99.85 | 98.33 | 0.44 |
| InppSk        | 85                | 100.00         | 100.94 | 99.65   | 99.71 | 96.83 | 0.35                                       | 100.00 | 99.96  | 99.11  | 96.96 | 0.36                                       | 100.00 | 100.00 | 99.88  | 99.44  | 97.59 | 0.37  |      |
| Mpeg1         | 85                | 100.00         | 100.00 | 99.74   | 99.88 | 96.81 | 0.77                                       | 100.00 | 100.00 | 99.87  | 99.35 | 97.14                                      | 0.78   | 100.00 | 100.00 | 100.00 | 99.86 | 98.07 | 0.83 |
| 6430573F11nRk | 86                | 99.98          | 99.83  | 99.71   | 99.30 | 96.87 | 0.35                                       | 100.00 | 100.00 | 100.00 | 99.70 | 97.65                                      | 0.36   | 100.00 | 100.00 | 100.00 | 99.87 | 98.18 | 0.38 |
| Acvr2b        | 86                | 99.91          | 99.91  | 99.81   | 98.78 | 94.69 | 0.28                                       | 100.00 | 100.00 | 99.95  | 99.27 | 95.39                                      | 0.29   | 100.00 | 100.00 | 100.00 | 99.59 | 96.50 | 0.31 |
| Clnr2         | 86                | 99.93          | 99.86  | 99.72   | 99.08 | 96.76 | 0.42                                       | 100.00 | 100.00 | 100.00 | 99.49 | 97.24                                      | 0.44   | 100.00 | 100.00 | 100.00 | 99.69 | 97.86 | 0.46 |
| Cxcl1         | 86                | 100.00         | 99.87  | 99.60   | 99.19 | 97.31 | 0.40                                       | 100.00 | 99.93  | 99.86  | 99.58 | 97.99                                      | 0.42   | 100.00 | 100.00 | 99.85  | 98.33 | 0.44  |      |
| InppSk        | 86                | 100.00         | 100.00 | 99.65   | 98.84 | 96.77 | 0.35                                       | 100.00 | 100.00 | 99.76  | 99.11 | 96.98                                      | 0.36   | 100.00 | 100.00 | 99.88  | 99.44 | 97.65 | 0.37 |
| Mpeg1         | 86                | 100.00         | 100.00 | 99.74   | 99.88 | 96.81 | 0.77                                       | 100.00 | 100.00 | 99.87  | 99.35 | 97.14                                      | 0.78   | 100.00 | 100.00 | 100.00 | 99.86 | 98.07 | 0.83 |
| 6430573F11nRk | 87                | 99.98          | 99.83  | 99.71   | 99.30 | 96.87 | 0.35                                       | 100.00 | 100.00 | 100.00 | 99.70 | 97.65                                      | 0.36   | 100.00 | 100.00 | 100.00 | 99.87 | 98.18 | 0.38 |
| Acvr2b        | 87                | 99.91          | 99.91  | 99.81</ |       |       |                                            |        |        |        |       |                                            |        |        |        |        |       |       |      |

This table summarises the percentage of WT sequence recall across a range of Filtlong threshold values with consensus thresholds ranging from 50% to 100%.
